# Supplementary material for: Magnitude and determinants of excess total, age-specific and sex-specific all-cause mortality in 24 countries worldwide during 2020 and 2021: results on the impact of the COVID-19 pandemic from the C-MOR project
Source: PubMed Central journal article supplement — BMJ Glob Health. 2024 Apr 18;9(4):e013018. doi: 10.1136/bmjgh-2023-013018 (PMC11029481; doi:10.1136/bmjgh-2023-013018), 2024-04-18
Supplement: bmjgh-2023-013018supp001.pdf [file bmjgh-2023-013018supp001.pdf]

## Supplementary Material

### Methods:

#### Regression equation used to estimate expected deaths (SEq1)

$$\text{Log}[E(Yt_i)] = \text{intercept} + \beta_1 * t_i + \beta_2 * \sin(2\pi * t_i / (365.25/7)) + \beta_3 * \cos(2\pi * t_i / (365.25/7)) + \beta_4 * \sin(2\pi * t_i / ((365.25/2)/7)) + \beta_5 * \cos(2\pi * t_i / ((365.25/2)/7))$$

Where,  $E(Yt_i)$  is the expected age standardized death rate at week  $i$ . Time trends were accounted for with a time variable " $t_i$ " that took values from 1 (1/2015) to  $n$  (52/2019), and seasonality was addressed using sine and cosine terms of 1 year ( $2\pi * t_i / (365.25/7)$ ) and half year ( $2\pi * t_i / ((365.25/2)/7)$ ) periods.

**Table S1. Summary of national data sources, period of available mortality data, time unit, availability of sex and age-specific data, and data quality of civil registration and vital statistics systems per country.**

| Country           | Partners                                                                            | Access Date                    | Source                                                                | Public data (Y/N) | Link (if available)               | Notes | Time Unit | Weekly sex specific data available | Weekly age specific data available | % Complete ness of vital registration systems* |
|-------------------|-------------------------------------------------------------------------------------|--------------------------------|-----------------------------------------------------------------------|-------------------|-----------------------------------|-------|-----------|------------------------------------|------------------------------------|------------------------------------------------|
| Australia         | Deakin University                                                                   | May 9th, 2022                  | Australian Bureau of Statistics                                       | YES               |                                   |       | ISO       | YES                                | YES                                | 100                                            |
| Austria           | Department for Epidemiology, Center for Public Health, Medical University of Vienna | August 22 <sup>nd</sup> , 2022 | Cause of death statistics, Statistics Austria                         | NO                |                                   |       | ISO       | YES                                | YES                                | 100                                            |
| Belgium           | Statistics Belgium                                                                  | NA                             | National register                                                     | YES               | <a href="#">Belgium</a>           |       | ISO       | YES                                | YES                                | 99.8                                           |
| Brazil            | Federal University of Rio de Janeiro and Fluminense Federal University              | July 13 <sup>th</sup> , 2022   | The Mortality Information System                                      | YES               | <a href="#">Brazil</a>            |       | Epi       | YES                                | YES                                | 99.3                                           |
| Cyprus            | University of Nicosia & Health Monitoring Unit, Cyprus Ministry of Health           | June 2022                      | Eurostat                                                              | YES               | <a href="#">Cyprus</a>            |       | ISO       | YES                                | YES                                | 90.7                                           |
| Denmark           | Statistics Denmark                                                                  | August 2022                    | Central Persons Register                                              | YES               | <a href="#">Denmark</a>           |       | Epi       | YES                                | YES                                | 100                                            |
| England and Wales | St George's, University of London                                                   | June 25th, 2022                | Office for National Statistics                                        | YES               | <a href="#">England and Wales</a> |       | National  | YES                                | YES                                | 100                                            |
| Estonia           | National Institute for Health Development                                           | June 14 <sup>th</sup> , 2022   | Estonian Causes of Death Register                                     | YES               | <a href="#">Estonia</a>           |       | ISO       | YES                                | YES                                | 100                                            |
| France            | EHESP                                                                               | June 3rd, 2022                 | Institut National de la Statistique et des Etudes Economiques (INSEE) | YES               | <a href="#">France</a>            |       | ISO       | YES                                | YES                                | 100                                            |
| Georgia           | National Center for Disease control and Public                                      | June 2021, June 2022           | Vital Registration System                                             | NO                |                                   |       | ISO       | YES                                | YES                                | 94.3                                           |

|                  |                                                                                             |                              |                                                                                                                                                                               |     |                                                    |  |          |                 |     |      |
|------------------|---------------------------------------------------------------------------------------------|------------------------------|-------------------------------------------------------------------------------------------------------------------------------------------------------------------------------|-----|----------------------------------------------------|--|----------|-----------------|-----|------|
|                  | Health (Primary organization), National Statistics Office of Georgia (partner organization) |                              |                                                                                                                                                                               |     |                                                    |  |          |                 |     |      |
| Greece           | Laboratory for Health Technology Assessment, University of West Attica                      | October 3rd, 2022            | Hellenic Statistical Authority                                                                                                                                                | YES | <a href="#">Greece</a>                             |  | ISO      | YES             | YES | 100  |
| Israel           | Central Bureau of Statistics                                                                | 2021-2022                    | Code list from death certificates                                                                                                                                             | NO  |                                                    |  | Epi      | YES             | YES | 100  |
| Italy            | Department of Medicine, University of Perugia                                               | 2019-2021                    | National Health System                                                                                                                                                        | NO  |                                                    |  | Epi      | YES             | YES | 100  |
| Kazakhstan       | Asfendiyarov Kazakh National Medical University                                             | 2021-2022                    | Ministry of health reports and the Republican Center of e-health records                                                                                                      | NO  |                                                    |  | ISO      | YES             | YES | 88.3 |
| Mauritius        | Statistics Mauritius                                                                        | 2022                         | Statistics Mauritius - Government agency                                                                                                                                      | NO  |                                                    |  | National | YES             | YES | 99.8 |
| Northern Ireland | St George's, University of London                                                           | June 25th, 2022              | Northern Ireland Statistics and Research Agency                                                                                                                               | NO  |                                                    |  | National | NO <sup>a</sup> | YES | 100  |
| Norway           | University of Oslo                                                                          | Regularly                    | Statistics Norway, The Cause of Death Registry                                                                                                                                | YES | <a href="#">Norway</a>                             |  | ISO      | YES             | YES | 100  |
| Peru             | Universidad del Pacífico                                                                    | 2021-2022                    | Ministerio de Salud                                                                                                                                                           | YES |                                                    |  | ISO      | NO <sup>b</sup> | YES | 64.4 |
| Poland           | Nicolaus Copernicus University in Toruń                                                     | October 10th-11th, 2022      | Statistics Poland                                                                                                                                                             | YES | <a href="#">Poland</a>                             |  | ISO      | YES             | YES | 100  |
| Slovenia         | National Institute of Public Health                                                         | 2022                         | Human Mortality Database                                                                                                                                                      | YES |                                                    |  | ISO      | YES             | YES | 94.8 |
| Spain            | University of Oviedo                                                                        | July 31 <sup>st</sup> , 2022 | Spanish Institute of Statistics                                                                                                                                               | YES | <a href="#">Spain</a>                              |  | ISO      | YES             | YES | 100  |
| Sweden           | Karolinska Institutet                                                                       | 2022                         | National Board of Health and Welfare                                                                                                                                          | YES | <a href="#">Sweden</a>                             |  | ISO      | YES             | YES | 100  |
| Ukraine          | Bogomolets National medical University                                                      | April 2020, 2021             | Bogomolets National medical University, <a href="http://database.ukrcensus.gov.ua/MULT/Dialog/statfile_c_fil">http://database.ukrcensus.gov.ua/MULT/Dialog/statfile_c_fil</a> | YES | <a href="#">Ukraine</a><br><a href="#">Ukraine</a> |  | ISO      | YES             | YES | 100  |

|     |                   |           |                                                                      |     |                     |  |     |     |     |      |
|-----|-------------------|-----------|----------------------------------------------------------------------|-----|---------------------|--|-----|-----|-----|------|
|     |                   |           | <a href="#">es/az.html</a>                                           |     |                     |  |     |     |     |      |
| USA | Our World in Data | July 2022 | Human Mortality Database (HMD) and the World Mortality Dataset (WMD) | YES | <a href="#">USA</a> |  | Epi | YES | YES | 99.9 |

Abbreviations: ISO: International Organization for Standardization; Epi: epidemiological

\* Source: Supplementary Appendix 1 from Abbafati C, Abbas KM, Abbasi-Kangevari M, et al. Global burden of 369 diseases and injuries in 204 countries and territories, 1990–2019: a systematic analysis for the Global Burden of Disease Study 2019. *Lancet*. 2020;396(10258):1204-1222. doi:10.1016/S0140-6736(20)30925-9

Table S2. Description of aggregate age groups created for the age-standardization according to age-specific all-cause mortality data availability.

| Country           | Age groups_Category 1  | Age groups_Category 2  | Age groups_Category 3 | Age groups_Category 4 | Age groups_Category 5 |
|-------------------|------------------------|------------------------|-----------------------|-----------------------|-----------------------|
|                   | <15, 15-44, 45-65, 65+ | <20, 20-49, 50-69, 70+ | <45, 45-64, 65+       | <20, 20-69, 70+       | <15, 15-64, 65+       |
| Australia         | x                      |                        |                       |                       |                       |
| Austria           | x                      |                        |                       |                       |                       |
| Belgium           |                        |                        | x                     |                       |                       |
| Brazil            | x                      |                        |                       |                       |                       |
| Cyprus            | x                      |                        |                       |                       |                       |
| Denmark           | x                      |                        |                       |                       |                       |
| England and Wales | x                      |                        |                       |                       |                       |
| Estonia           |                        | x                      |                       |                       |                       |
| France            |                        | x                      |                       |                       |                       |
| Georgia           | x                      |                        |                       |                       |                       |
| Greece            |                        |                        |                       |                       | x                     |
| Israel            | x                      |                        |                       |                       |                       |
| Italy             | x                      |                        |                       |                       |                       |
| Kazakhstan        |                        | x                      |                       |                       |                       |
| Mauritius         |                        | x                      |                       |                       |                       |
| N. Ireland        | x                      |                        |                       |                       |                       |
| Norway            | x                      |                        |                       |                       |                       |
| Peru              | x                      |                        |                       |                       |                       |
| Poland            | x                      |                        |                       |                       |                       |
| Slovenia          | x                      |                        |                       |                       |                       |
| Spain             |                        |                        |                       |                       | x                     |
| Sweden            |                        | x                      |                       |                       |                       |
| Ukraine           |                        |                        |                       | x                     |                       |
| USA               |                        |                        |                       |                       | x                     |

**Equation used for age-standardization for the aggregate age groups category 1 (<15, 15-44, 45-65, 65+); CDR = age specific crude death rate**

$$\text{asdr1\_totalpop} = ((\text{CDR0-14} * 0.2615) + (\text{CDR15-44} * 0.4597) + (\text{CDR45-64} * 0.1968) + (\text{CDR65+} * 0.08235))$$

(same equation applies for male and female population)

**Equation used for age-standardization for the aggregate age groups category 2 (<20, 20-49, 50-69, 70+); CDR = age specific crude death rate**

$$\text{asdr2\_totalpop} = ((\text{CDR0-19} * 0.3462) + (\text{CDR20-49} * 0.4354) + (\text{CDR50-69} * 0.166) + (\text{CDR70+} * 0.5275))$$

(same equation applies for male and female population)

**Equation used for age-standardization for the aggregate age groups category 3 (<45, 45-64, 65+); CDR = age specific crude death rate**

$$\text{asdr3\_totalpop} = ((\text{CDR0-44} * 0.7212) + (\text{CDR45-64} * 0.1968) + (\text{CDR65+} * 0.08235))$$

(same equation applies for male and female population)

**Equation used for age-standardization for the aggregate age groups category 4 (<20, 20-69, 70+); CDR = age specific crude death rate**

$$\text{asdr4\_totalpop} = ((\text{CDR0-19} * 0.3462) + (\text{CDR20-69} * 0.6014) + (\text{CDR70+} * 0.05275))$$

(same equation applies for male and female population)

**Equation used for age-standardization for the aggregate age groups category 5 (<15, 15-64, 65+); CDR = age specific crude death rate**

$$\text{asdr5\_totalpop} = ((\text{CDR0-14} * 0.2615) + (\text{CDR15-64} * 0.6565) + (\text{CDR65+} * 0.08235))$$

(same equation applies for male and female population)

**Table S3. Publicly available sources for the database of country-level sociodemographic variables (reported yearly) and pandemic related variables (reported weekly).**

For Northern Ireland, England and Wales, data is only available for "population" and "vaccination". Hence, for other variables, the UK data were used.

| Category                          | Variable Label                               | Description                                                                 | Time span | Range of Values | Data Source                                                                                                   | Weblink                            |
|-----------------------------------|----------------------------------------------|-----------------------------------------------------------------------------|-----------|-----------------|---------------------------------------------------------------------------------------------------------------|------------------------------------|
| <b>Sociodemographic Variables</b> |                                              |                                                                             |           |                 |                                                                                                               |                                    |
| POPULATION                        | Population density                           | Annual country population density per square kilometer                      | 2020-2021 | 3.34 – 411.22   | Department of Economic and Social Affairs, Population Division, United Nation                                 | <a href="#">population density</a> |
| POPULATION                        | Median age                                   | Median age of population (years)                                            | 2020-2021 | 27.96 – 46.83   | Department of Economic and Social Affairs, Population Division, United Nation                                 | <a href="#">median age</a>         |
| POPULATION                        | Percent of population more than 65 years old | Percentage of total population in the select age group, both sexes combined | 2020-2021 | 7.84 – 23.68    | Department of Economic and Social Affairs, Population Division, United Nation                                 | <a href="#">aged 65 older</a>      |
| POPULATION                        | Life expectancy                              | Life expectancy at birth, total (years)                                     | 2020      | 71.19 – 83.21   | Demographic and Health Surveys, Multiple Indicator Cluster Surveys, Household surveys, UN Population Division | <a href="#">life expectancy</a>    |
| POPULATION                        | Hypertension                                 | Prevalence of hypertension (% of adults ages 30-79)                         | 2019      | 20.70 – 49.20   | Health Nutrition and Population Statistics                                                                    | <a href="#">hypertension</a>       |
| POPULATION                        | Diabetes                                     | Prevalence of Diabetes (% of population ages 20 to 79)                      | 2019      | 3.60 – 10.70    | Health Nutrition and Population Statistics                                                                    | <a href="#">diabetes</a>           |
| POPULATION                        | Obesity                                      | Prevalence of obesity among adults, BMI $\geq$ 30                           | 2016      | 19.70 – 36.20   | The Global Health Observatory, WHO                                                                            | <a href="#">obesity</a>            |
| POPULATION                        | PM2.5 (air pollution)                        | PM2.5 air pollution, mean annual exposure (micrograms per cubic meter)      | 2019      | 6.18 – 24.79    | World Development Indicators                                                                                  | <a href="#">PM2.5</a>              |

|                      |                                                    |                                                                                                                                                                    |           |                                                                                                                     |                                       |                                          |
|----------------------|----------------------------------------------------|--------------------------------------------------------------------------------------------------------------------------------------------------------------------|-----------|---------------------------------------------------------------------------------------------------------------------|---------------------------------------|------------------------------------------|
| GOVERNMENT & ECONOMY | Gross Domestic Products (GDP)                      | GDP per capita, PPP (constant 2017 international \$)                                                                                                               | 2020-2021 | 11176.9 – 65662.17                                                                                                  | World Bank                            | <a href="#">gdp_per_capita</a>           |
| GOVERNMENT & ECONOMY | Human development index (HDI)                      | Summary measure of average achievement in key dimensions of human development: a long and healthy life, being knowledgeable and having a decent standard of living | 2021      | 0.75 – 0.96 (full range 1-100, with higher values indicating a higher level of development)                         | UNDP, Human Development Report        | <a href="#">human_development_index</a>  |
| GOVERNMENT & ECONOMY | Inequality-adjusted Human Development Index (IHDI) | IHDI adjusts the Human Development Index (HDI) for inequality in the distribution of each dimension across the population                                          | 2021      | 0.58 – 0.91 (full range 1-100, with higher values indicating a higher level of development adjusted for inequality) | UNDP, Human Development Report        | <a href="#">IHDI</a>                     |
| GOVERNMENT & ECONOMY | Gini index                                         | Income inequality between individuals or households within an economy                                                                                              | 2010-2020 | 24.40 – 48.90 (full range 1-100, with higher values indicating higher within population inequality)                 | UNDP, Human Development Report        | <a href="#">Gini</a>                     |
| GOVERNMENT & ECONOMY | Government Effectiveness                           | A measure of the quality of public services, civil service, policy formulation and implementation; including government investment in                              | 2020-2021 | -0.46 – 2.00 (full range -2.5 (less effective) to 2.5 (more effective))                                             | Worldwide Governance Indicators (WGI) | <a href="#">Government Effectiveness</a> |



|                       |                                       |                                                                                                                                                                                                                                                                   |                             |                                                                                 |                                                                                                       |                                                                                              |
|-----------------------|---------------------------------------|-------------------------------------------------------------------------------------------------------------------------------------------------------------------------------------------------------------------------------------------------------------------|-----------------------------|---------------------------------------------------------------------------------|-------------------------------------------------------------------------------------------------------|----------------------------------------------------------------------------------------------|
|                       |                                       | improvement and maintenance of these services                                                                                                                                                                                                                     |                             |                                                                                 |                                                                                                       |                                                                                              |
| GOVERNMENT & ECONOMY  | Government revenue                    | Money received by a government from taxes and non-tax sources to enable it to undertake public expenditure (% of GDP)                                                                                                                                             | 2020-2021                   | 14.94 – 59.25<br>(full range: 0-100)                                            | The Organization for Economic Co-operation and Development (OECD) & International Monetary Fund (IMF) | <a href="#">Gov_rev1</a> ,<br><a href="#">Gov_rev2</a> ,<br><a href="#">Gov_rev3</a>         |
| HEALTH CARE RESOURCES | Hospital beds per thousand population | Hospital bed density per 1,000 population                                                                                                                                                                                                                         | 2019 or last available year | 1.59 – 7.46                                                                     | The Organization for Economic Co-operation and Development (OECD) & World Bank                        | <a href="#">hospital_beds_per_thousand1</a> ,<br><a href="#">hospital_beds_per_thousand2</a> |
| HEALTH CARE RESOURCES | Total nursing personnel               | Total number of nurses (per 10,000 population)                                                                                                                                                                                                                    | 2019 or last available year | 16.46 – 75.03<br>19.89 – 186.22                                                 | WHO NHWA Data Platform - December 2022 update.                                                        | <a href="#">Nursing.Personnel.Total</a>                                                      |
| HEALTH CARE RESOURCES | Total medical doctors                 | Total number of medical doctors (per 10,000 population)                                                                                                                                                                                                           | 2019 or last available year | 19.89 – 186.22                                                                  | WHO NHWA Data Platform - December 2022 update.                                                        | <a href="#">Medical.Doctors.Total</a>                                                        |
| HEALTH CARE RESOURCES | Universal Health Coverage             | % population coverage of essential health services (defined as the average coverage of essential services based on tracer interventions that include reproductive, maternal, newborn and child health, infectious diseases, non-communicable diseases and service | 2020                        | 55.95 – 99.90<br>(full range: 0 – 100, with 100 being full population coverage) | The Institute for Health Metrics and Evaluation (IHME)                                                | <a href="#">uhc</a>                                                                          |

|                                   |                                           |                                                                                                                                                    |           |                                                                                                       |                                                                                                                                                                                                          |                                    |
|-----------------------------------|-------------------------------------------|----------------------------------------------------------------------------------------------------------------------------------------------------|-----------|-------------------------------------------------------------------------------------------------------|----------------------------------------------------------------------------------------------------------------------------------------------------------------------------------------------------------|------------------------------------|
|                                   |                                           | capacity and access, among the general and the most disadvantaged population)                                                                      |           |                                                                                                       |                                                                                                                                                                                                          |                                    |
| HEALTH CARE RESOURCES             | Completeness of vital registration        | Completeness of vital registration systems as assessed in 2019                                                                                     | 2019      | 64.40 – 100.00                                                                                        | GBD 2019 Diseases and Injuries Collaborators. Global burden of 369 diseases and injuries in 204 countries and territories, 1990–2019: a systematic analysis for the Global Burden of Disease Study 2019. | <a href="#">Completeness</a>       |
| HEALTH CARE RESOURCES             | Healthcare Access and Quality Index (HAQ) | Index based on death rates from 32 causes of death that could be avoided by timely and effective medical care (also known as 'amenable mortality') | 2019      | 52.97 – 90.40 (full range: 0-100, with higher values indicating better healthcare access and quality) | Global Burden of Disease Study 2019 (GBD 2019)                                                                                                                                                           | <a href="#">HAQ</a>                |
| <b>Pandemic Related Variables</b> |                                           |                                                                                                                                                    |           |                                                                                                       |                                                                                                                                                                                                          |                                    |
| POPULATION                        | Weekly incidence of COVID-19              | Number of COVID-19 new cases per week per 1,000 population                                                                                         | 2020-2021 | 0.002 – 230.6                                                                                         | Our World in Data                                                                                                                                                                                        | <a href="#">COVID19 new cases</a>  |
| POLICY                            | Stringency index                          | Mean stringency index per week                                                                                                                     | 2020-2021 | 0 – 100 (full range: 0 – 100, with higher values indicating more stringent control measures)          | Blavatnik School of Government, University of Oxford                                                                                                                                                     | <a href="#">stringency_index</a>   |
| HEALTH RESOURCES                  | Fully vaccinated                          | People fully vaccinated per hundred each                                                                                                           | 2020-2021 | 0.00 – 79.94                                                                                          | Our World in Data                                                                                                                                                                                        | <a href="#">fully vaccinated %</a> |

|  |  |      |  |  |  |  |
|--|--|------|--|--|--|--|
|  |  | week |  |  |  |  |
|--|--|------|--|--|--|--|

Table S4. Cumulative observed and expected ASMRs per 100,000 population for 2020; total population.

| Country           | Observed mortality rate / 100,000 population* | Expected mortality rate / 100,000 population* | Lower limit of 95% CI of Expected mortality rate | Upper limit of 95% CI of Expected mortality rate | Difference (Observed-Expected mortality rate) | Difference using the Lower limit of 95% CI of Expected mortality rate | Difference using the Upper limit of 95% CI of Expected mortality rate | P-score (the ratio of the excess to the expected, expressed as a percentage) |
|-------------------|-----------------------------------------------|-----------------------------------------------|--------------------------------------------------|--------------------------------------------------|-----------------------------------------------|-----------------------------------------------------------------------|-----------------------------------------------------------------------|------------------------------------------------------------------------------|
| Australia         | 371.7                                         | 369.5                                         | 364.2                                            | 374.9                                            | 2.2                                           | 7.5                                                                   | -3.2                                                                  | 0.6                                                                          |
| Austria           | 499.5                                         | 452.5                                         | 443.9                                            | 461.2                                            | 47.0 ↑                                        | 55.6                                                                  | 38.3                                                                  | 10.4                                                                         |
| Belgium           | 538.4                                         | 457.3                                         | 449.4                                            | 465.2                                            | 81.1 ↑                                        | 89.0                                                                  | 73.2                                                                  | 17.7                                                                         |
| Brazil            | 666.2                                         | 578.2                                         | 571.5                                            | 584.8                                            | 88.0 ↑                                        | 94.7                                                                  | 81.4                                                                  | 15.2                                                                         |
| Cyprus            | 410.8                                         | 386.8                                         | 373.7                                            | 400.0                                            | 24.0 ↑                                        | 37.1                                                                  | 10.7                                                                  | 6.2                                                                          |
| Denmark           | 447.3                                         | 444.4                                         | 438.6                                            | 450.2                                            | 3.0                                           | 8.8                                                                   | -2.9                                                                  | 0.7                                                                          |
| England and Wales | 521.4                                         | 449.3                                         | 440.8                                            | 457.9                                            | 72.1 ↑                                        | 80.6                                                                  | 63.5                                                                  | 16.0                                                                         |
| Estonia           | 639.0                                         | 607.6                                         | 594.1                                            | 621.2                                            | 31.3 ↑                                        | 44.9                                                                  | 17.7                                                                  | 5.2                                                                          |
| France            | 457.6                                         | 416.2                                         | 410.6                                            | 421.9                                            | 41.3 ↑                                        | 46.9                                                                  | 35.7                                                                  | 9.9                                                                          |
| Georgia           | 864.7                                         | 770.6                                         | 754.4                                            | 786.8                                            | 94.2 ↑                                        | 110.3                                                                 | 77.9                                                                  | 12.2                                                                         |
| Greece            | 577.5                                         | 536.6                                         | 527.1                                            | 546.2                                            | 40.8 ↑                                        | 50.3                                                                  | 31.3                                                                  | 7.6                                                                          |
| Israel            | 432.2                                         | 399.9                                         | 394.3                                            | 405.6                                            | 32.3 ↑                                        | 37.9                                                                  | 26.5                                                                  | 8.1                                                                          |
| Italy             | 479.8                                         | 428.9                                         | 421.5                                            | 436.4                                            | 50.9 ↑                                        | 58.4                                                                  | 43.4                                                                  | 11.9                                                                         |
| Kazakhstan        | 770.8                                         | 620.2                                         | 610.0                                            | 630.4                                            | 150.6 ↑                                       | 160.8                                                                 | 140.3                                                                 | 24.3                                                                         |
| Mauritius         | 663.9                                         | 694.7                                         | 678.1                                            | 711.4                                            | -30.8 ↓                                       | -14.2                                                                 | -47.6                                                                 | -4.4                                                                         |
| Northern Ireland  | 512.3                                         | 465.2                                         | 451.6                                            | 478.9                                            | 47.1 ↑                                        | 60.7                                                                  | 33.4                                                                  | 10.1                                                                         |
| Norway            | 395.4                                         | 387.6                                         | 382.1                                            | 393.1                                            | 7.8 ↑                                         | 13.3                                                                  | 2.3                                                                   | 2.0                                                                          |
| Peru              | 651.9                                         | 378.9                                         | 373.0                                            | 384.7                                            | 273.0 ↑                                       | 278.8                                                                 | 267.1                                                                 | 72.1                                                                         |
| Poland            | 666.5                                         | 576.6                                         | 568.5                                            | 584.7                                            | 89.9 ↑                                        | 97.9                                                                  | 81.8                                                                  | 15.6                                                                         |
| Slovenia          | 523.3                                         | 456.0                                         | 446.5                                            | 465.7                                            | 67.2 ↑                                        | 76.8                                                                  | 57.6                                                                  | 14.7                                                                         |

|                |       |       |       |       |         |       |      |      |
|----------------|-------|-------|-------|-------|---------|-------|------|------|
| <b>Spain</b>   | 521.7 | 439.9 | 433.7 | 446.3 | 81.7 ↑  | 88.0  | 75.4 | 18.6 |
| <b>Sweden</b>  | 395.6 | 352.3 | 347.1 | 357.5 | 43.4 ↑  | 48.5  | 38.2 | 12.3 |
| <b>Ukraine</b> | 699.5 | 614.1 | 565.6 | 664.0 | 85.4 ↑  | 133.9 | 35.5 | 13.9 |
| <b>USA</b>     | 651.5 | 551.0 | 544.5 | 557.5 | 100.5 ↑ | 107.0 | 94.0 | 18.2 |

\*For all countries, the sum of observed and expected deaths is up to week 52, with the exception of England & Wales (starting from week 2 up to week 51), Kazakhstan and Mauritius (starting from week 2 up to week 52), Northern Ireland (up to week 50), and Slovenia (up to 51).

↑ Indicates statistically significant excess all-cause mortality using the sum of deaths for 2020.

↓ Indicates a statistically significant reduction all-cause mortality using the sum of deaths for 2020.

Due to the variability in the provided age groupings by countries, age-standardised mortality values are not entirely comparable between countries and direct comparisons between countries should be avoided.

Table S5. Cumulative observed and expected ASMRs per 100,000 population for 2021; total population.

| Country           | Observed mortality rate / 100,000 population* | Expected mortality rate / 100,000 population* | Lower limit of 95% CI of Expected mortality rate | Upper limit of 95% CI of Expected mortality rate | Difference (Observed-Expected mortality rate) | Difference using the Lower limit of 95% CI of Expected mortality rate | Difference using the Upper limit of 95% CI of Expected mortality rate | P-score (the ratio of the excess to the expected, expressed as a percentage) |
|-------------------|-----------------------------------------------|-----------------------------------------------|--------------------------------------------------|--------------------------------------------------|-----------------------------------------------|-----------------------------------------------------------------------|-----------------------------------------------------------------------|------------------------------------------------------------------------------|
| Australia         | 373.5                                         | 361.7                                         | 356.4                                            | 367.0                                            | 11.8 ↑                                        | 17.1                                                                  | 6.5                                                                   | 3.3                                                                          |
| Austria           | 486.8                                         | 447.7                                         | 439.1                                            | 456.4                                            | 39.1 ↑                                        | 47.7                                                                  | 30.4                                                                  | 8.7                                                                          |
| Belgium           | 471.3                                         | 447.7                                         | 439.9                                            | 455.5                                            | 23.7 ↑                                        | 31.5                                                                  | 15.8                                                                  | 5.3                                                                          |
| Brazil            | 742.3                                         | 569.8                                         | 563.2                                            | 576.4                                            | 172.6 ↑                                       | 179.2                                                                 | 165.9                                                                 | 30.3                                                                         |
| Cyprus            | 434.5                                         | 381.2                                         | 368.2                                            | 394.5                                            | 53.2 ↑                                        | 66.3                                                                  | 40.0                                                                  | 14.0                                                                         |
| Denmark           | 452.5                                         | 440.5                                         | 434.7                                            | 446.4                                            | 12.0 ↑                                        | 17.8                                                                  | 6.1                                                                   | 2.7                                                                          |
| England and Wales | 500.9                                         | 441.8                                         | 433.3                                            | 450.4                                            | 59.0 ↑                                        | 67.5                                                                  | 50.5                                                                  | 13.4                                                                         |
| Estonia           | 721.4                                         | 596.2                                         | 582.7                                            | 609.8                                            | 125.2 ↑                                       | 138.7                                                                 | 111.6                                                                 | 21.0                                                                         |
| France            | 439.0                                         | 406.9                                         | 401.3                                            | 412.5                                            | 32.2 ↑                                        | 37.8                                                                  | 26.5                                                                  | 7.9                                                                          |
| Georgia           | 1006.5                                        | 749.8                                         | 733.8                                            | 765.9                                            | 256.8 ↑                                       | 272.7                                                                 | 240.6                                                                 | 34.2                                                                         |
| Greece            | 628.3                                         | 535.1                                         | 525.6                                            | 544.7                                            | 93.2 ↑                                        | 102.7                                                                 | 83.5                                                                  | 17.4                                                                         |
| Israel            | 434.1                                         | 389.5                                         | 383.9                                            | 395.2                                            | 44.5 ↑                                        | 50.2                                                                  | 38.9                                                                  | 11.4                                                                         |
| Italy             | 444.9                                         | 414.1                                         | 406.7                                            | 421.5                                            | 30.8 ↑                                        | 38.2                                                                  | 23.4                                                                  | 7.4                                                                          |
| Kazakhstan        | 961.5                                         | 622.8                                         | 612.6                                            | 633.2                                            | 338.7 ↑                                       | 349.0                                                                 | 328.3                                                                 | 54.4                                                                         |
| Mauritius         | 646.6                                         | 700.5                                         | 683.7                                            | 717.4                                            | -53.9 ↓                                       | -37.1                                                                 | -70.8                                                                 | -7.7                                                                         |
| Northern Ireland  | 512.8                                         | 457.5                                         | 443.9                                            | 471.2                                            | 55.3 ↑                                        | 68.9                                                                  | 41.6                                                                  | 12.1                                                                         |
| Norway            | 393.3                                         | 377.3                                         | 371.9                                            | 382.8                                            | 16.0 ↑                                        | 21.4                                                                  | 10.5                                                                  | 4.2                                                                          |
| Peru              | 725.3                                         | 390.4                                         | 384.3                                            | 396.5                                            | 334.9 ↑                                       | 341.0                                                                 | 328.8                                                                 | 85.8                                                                         |
| Poland            | 708.5                                         | 568.5                                         | 560.4                                            | 576.6                                            | 140.0 ↑                                       | 148.1                                                                 | 131.9                                                                 | 24.6                                                                         |
| Slovenia          | 500.8                                         | 448.0                                         | 438.5                                            | 457.6                                            | 52.8 ↑                                        | 62.3                                                                  | 43.2                                                                  | 11.8                                                                         |

|                |       |       |       |       |         |       |       |      |
|----------------|-------|-------|-------|-------|---------|-------|-------|------|
| <b>Spain</b>   | 468.9 | 433.1 | 426.9 | 439.5 | 35.8 ↑  | 42.0  | 29.4  | 8.3  |
| <b>Sweden</b>  | 360.7 | 338.7 | 333.7 | 343.9 | 22.0 ↑  | 27.1  | 16.8  | 6.5  |
| <b>Ukraine</b> | 853.2 | 587.2 | 539.5 | 636.2 | 266.0 ↑ | 313.7 | 216.9 | 45.3 |
| <b>USA</b>     | 658.6 | 546.2 | 539.7 | 552.7 | 112.4 ↑ | 118.9 | 105.9 | 20.6 |

\*For all countries, the sum of observed and expected deaths is up to week 52, with the exception of England & Wales (starting from week 2 up to week 51), Kazakhstan and Mauritius (starting from week 2 up to week 52), Northern Ireland (up to week 50), and Slovenia (up to 51).

↑ Indicates statistically significant excess all-cause mortality using the sum of deaths for 2021.

↓ Indicates a statistically significant reduction all-cause mortality using the sum of deaths for 2021.

Due to the variability in the provided age groupings by countries, age-standardised mortality values are not entirely comparable between countries and direct comparisons between countries should be avoided.

Table S6. Cumulative observed and expected ASMRs per 100,000 population for the years 2020 and 2021 together; total population.

| Country           | Observed mortality rate / 100,000 population* | Expected mortality rate / 100,000 population* | Lower limit of 95% CI of Expected mortality rate | Upper limit of 95% CI of Expected mortality rate | Difference (Observed-Expected mortality rate) | Difference using the Lower limit of 95% CI of Expected mortality rate | Difference using the Upper limit of 95% CI of Expected mortality rate | P-score (the ratio of the excess to the expected, expressed as a percentage) |
|-------------------|-----------------------------------------------|-----------------------------------------------|--------------------------------------------------|--------------------------------------------------|-----------------------------------------------|-----------------------------------------------------------------------|-----------------------------------------------------------------------|------------------------------------------------------------------------------|
| Australia         | 372.6                                         | 365.6                                         | 361.9                                            | 369.4                                            | 7.0↑                                          | 10.7                                                                  | 3.2                                                                   | 1.9                                                                          |
| Austria           | 493.1                                         | 450.1                                         | 444.0                                            | 456.3                                            | 43.0↑                                         | 49.1                                                                  | 36.9                                                                  | 9.6                                                                          |
| Belgium           | 504.9                                         | 452.5                                         | 446.9                                            | 458.0                                            | 52.4↑                                         | 57.9                                                                  | 46.8                                                                  | 11.6                                                                         |
| Brazil            | 704.3                                         | 574.0                                         | 569.3                                            | 578.7                                            | 130.3↑                                        | 135.0                                                                 | 125.6                                                                 | 22.7                                                                         |
| Cyprus            | 422.6                                         | 384.0                                         | 374.7                                            | 393.4                                            | 38.6↑                                         | 47.9                                                                  | 29.3                                                                  | 10.1                                                                         |
| Denmark           | 449.9                                         | 442.5                                         | 409.1                                            | 417.1                                            | 7.5↑                                          | 40.8                                                                  | 32.9                                                                  | 1.7                                                                          |
| England and Wales | 511.1                                         | 445.6                                         | 439.5                                            | 451.6                                            | 65.6↑                                         | 71.6                                                                  | 59.5                                                                  | 14.7                                                                         |
| Estonia           | 680.2                                         | 601.9                                         | 592.4                                            | 611.5                                            | 78.3↑                                         | 87.8                                                                  | 68.7                                                                  | 13.0                                                                         |
| France            | 448.3                                         | 411.6                                         | 407.6                                            | 415.5                                            | 36.7↑                                         | 40.7                                                                  | 32.8                                                                  | 8.9                                                                          |
| Georgia           | 935.6                                         | 760.2                                         | 748.8                                            | 771.6                                            | 175.5↑                                        | 186.8                                                                 | 164.0                                                                 | 23.1                                                                         |
| Greece            | 602.9                                         | 535.9                                         | 529.1                                            | 542.7                                            | 67.0↑                                         | 73.7                                                                  | 60.2                                                                  | 12.5                                                                         |
| Israel            | 433.1                                         | 394.7                                         | 390.7                                            | 398.7                                            | 38.4↑                                         | 42.4                                                                  | 34.4                                                                  | 9.7                                                                          |
| Italy             | 462.3                                         | 421.5                                         | 416.3                                            | 426.8                                            | 40.8↑                                         | 46.1                                                                  | 35.6                                                                  | 9.7                                                                          |
| Kazakhstan        | 866.2                                         | 621.5                                         | 614.3                                            | 628.8                                            | 244.6↑                                        | 251.9                                                                 | 237.4                                                                 | 39.4                                                                         |
| Mauritius         | 655.2                                         | 697.6                                         | 685.7                                            | 709.5                                            | -42.3↓                                        | -30.5                                                                 | -54.2                                                                 | -6.1                                                                         |
| Northern Ireland  | 512.5                                         | 461.3                                         | 451.7                                            | 471.0                                            | 51.2↑                                         | 60.9                                                                  | 41.5                                                                  | 11.1                                                                         |
| Norway            | 374.5                                         | 359.5                                         | 355.8                                            | 363.3                                            | 14.9↑                                         | 18.6                                                                  | 11.2                                                                  | 4.1                                                                          |
| Peru              | 685.1                                         | 383.6                                         | 379.4                                            | 387.8                                            | 301.5↑                                        | 305.7                                                                 | 297.3                                                                 | 78.6                                                                         |
| Poland            | 696.3                                         | 582.0                                         | 576.3                                            | 587.8                                            | 114.3↑                                        | 120.1                                                                 | 108.6                                                                 | 19.6                                                                         |



|                 |       |       |       |       |        |       |       |      |
|-----------------|-------|-------|-------|-------|--------|-------|-------|------|
| <b>Slovenia</b> | 512.0 | 452.0 | 445.3 | 458.8 | 60.0↑  | 66.8  | 53.2  | 13.3 |
| <b>Spain</b>    | 495.3 | 436.5 | 432.1 | 441.0 | 58.7↑  | 63.2  | 54.3  | 13.5 |
| <b>Sweden</b>   | 378.2 | 345.5 | 341.9 | 349.2 | 32.7↑  | 36.3  | 29.0  | 9.5  |
| <b>Ukraine</b>  | 776.3 | 600.7 | 566.5 | 635.5 | 175.7↑ | 209.8 | 140.9 | 29.2 |
| <b>USA</b>      | 655.0 | 548.6 | 544.0 | 553.2 | 106.5↑ | 111.1 | 101.9 | 19.4 |

\*For all countries, the sum of observed and expected deaths is up to week 52, with the exception of England & Wales (starting from week 2 up to week 51), Kazakhstan and Mauritius (starting from week 2 up to week 52), Northern Ireland (up to week 50), and Slovenia (up to 51).

↑ Indicates statistically significant excess all-cause mortality using the sum of deaths for 2020 and 2021.

↓ Indicates a statistically significant reduction all-cause mortality using the sum of deaths for 2020 and 2021.

Due to the variability in the provided age groupings by countries, age-standardised mortality values are not entirely comparable between countries and direct comparisons between countries should be avoided.

Table S7. Cumulative observed and expected mortality rate for 2020 by sex.

| Country           | Males                                         |                                               |                                                  |                                                  |                                                |                                                                       |                                                                       |                                                                              | Females                                       |                                               |                                                  |                                                  |                                                |                                                                       |                                                                       |                                                                              |
|-------------------|-----------------------------------------------|-----------------------------------------------|--------------------------------------------------|--------------------------------------------------|------------------------------------------------|-----------------------------------------------------------------------|-----------------------------------------------------------------------|------------------------------------------------------------------------------|-----------------------------------------------|-----------------------------------------------|--------------------------------------------------|--------------------------------------------------|------------------------------------------------|-----------------------------------------------------------------------|-----------------------------------------------------------------------|------------------------------------------------------------------------------|
|                   | Observed mortality rate / 100,000 population* | Expected mortality rate / 100,000 population* | Lower limit of 95% CI of Expected mortality rate | Upper limit of 95% CI of Expected mortality rate | Difference (Observed- Expected mortality rate) | Difference using the Lower limit of 95% CI of Expected mortality rate | Difference using the Upper limit of 95% CI of Expected mortality rate | P-score (the ratio of the excess to the expected, expressed as a percentage) | Observed mortality rate / 100,000 population* | Expected mortality rate / 100,000 population* | Lower limit of 95% CI of Expected mortality rate | Upper limit of 95% CI of Expected mortality rate | Difference (Observed- Expected mortality rate) | Difference using the Lower limit of 95% CI of Expected mortality rate | Difference using the Upper limit of 95% CI of Expected mortality rate | P-score (the ratio of the excess to the expected, expressed as a percentage) |
| Australia         | 418.5                                         | 415.7                                         | 410.1                                            | 421.3                                            | 2.8                                            | 8.4                                                                   | -2.8                                                                  | 0.7                                                                          | 327.8                                         | 326.0                                         | 321.0                                            | 331.0                                            | 1.9                                            | 6.8                                                                   | -3.1                                                                  | 0.6                                                                          |
| Austria           | 564.4                                         | 505.4                                         | 495.5                                            | 515.3                                            | 59.0 ↑                                         | 68.8                                                                  | 49.0                                                                  | 11.7                                                                         | 441.5                                         | 404.7                                         | 396.1                                            | 413.5                                            | 36.7 ↑                                         | 45.4                                                                  | 28.0                                                                  | 9.1                                                                          |
| Belgium           | 594.6                                         | 504.5                                         | 496.0                                            | 513.1                                            | 90.1 ↑                                         | 98.6                                                                  | 81.5                                                                  | 17.9                                                                         | 486.8                                         | 413.7                                         | 405.4                                            | 422.0                                            | 73.1 ↑                                         | 81.4                                                                  | 64.7                                                                  | 17.7                                                                         |
| Brazil            | 824.7                                         | 702.7                                         | 695.4                                            | 710.1                                            | 122.0 ↑                                        | 129.3                                                                 | 114.7                                                                 | 17.4                                                                         | 528.8                                         | 468.7                                         | 462.7                                            | 474.7                                            | 60.1 ↑                                         | 66.1                                                                  | 54.1                                                                  | 12.8                                                                         |
| Cyprus            | 471.4                                         | 446.0                                         | 427.8                                            | 464.4                                            | 25.4 ↑                                         | 43.6                                                                  | 7.0                                                                   | 5.7                                                                          | 354.9                                         | 332.6                                         | 316.9                                            | 348.7                                            | 22.3 ↑                                         | 38.0                                                                  | 6.3                                                                   | 6.7                                                                          |
| Denmark           | 498.2                                         | 494.4                                         | 486.9                                            | 502.0                                            | 3.7                                            | 11.3                                                                  | -3.8                                                                  | 0.8                                                                          | 399.8                                         | 397.3                                         | 391.0                                            | 403.7                                            | 2.4                                            | 8.8                                                                   | -3.9                                                                  | 0.6                                                                          |
| England and Wales | 604.7                                         | 495.1                                         | 486.3                                            | 504.0                                            | 109.6 ↑                                        | 118.4                                                                 | 100.7                                                                 | 22.1                                                                         | 468.8                                         | 406.8                                         | 398.4                                            | 415.4                                            | 62.0 ↑                                         | 70.4                                                                  | 53.4                                                                  | 15.2                                                                         |
| Estonia           | 812.5                                         | 776.6                                         | 755.3                                            | 798.1                                            | 35.9 ↑                                         | 57.2                                                                  | 14.5                                                                  | 4.6                                                                          | 497.7                                         | 471.3                                         | 458.4                                            | 484.3                                            | 26.4 ↑                                         | 39.3                                                                  | 13.4                                                                  | 5.6                                                                          |
| France            | 546.0                                         | 491.3                                         | 485.2                                            | 497.5                                            | 54.7 ↑                                         | 60.8                                                                  | 48.5                                                                  | 11.1                                                                         | 380.6                                         | 350.0                                         | 344.8                                            | 355.1                                            | 30.7 ↑                                         | 35.8                                                                  | 25.5                                                                  | 8.8                                                                          |
| Georgia           | 1180.4                                        | 1041.5                                        | 1019.3                                           | 1063.9                                           | 138.9 ↑                                        | 161.1                                                                 | 116.6                                                                 | 13.3                                                                         | 642.1                                         | 574.6                                         | 559.5                                            | 589.9                                            | 67.4 ↑                                         | 82.6                                                                  | 52.2                                                                  | 11.7                                                                         |
| Greece            | 654.9                                         | 610.0                                         | 599.7                                            | 620.4                                            | 44.8 ↑                                         | 55.2                                                                  | 34.4                                                                  | 7.3                                                                          | 503.9                                         | 466.9                                         | 457.1                                            | 476.8                                            | 37.0 ↑                                         | 46.8                                                                  | 27.1                                                                  | 7.9                                                                          |
| Israel            | 492.2                                         | 447.8                                         | 440.1                                            | 455.6                                            | 44.3 ↑                                         | 52.1                                                                  | 36.6                                                                  | 9.9                                                                          | 378.7                                         | 356.3                                         | 349.7                                            | 363.0                                            | 22.4 ↑                                         | 29.0                                                                  | 15.7                                                                  | 6.3                                                                          |
| Italy             | 535.7                                         | 472.9                                         | 465.5                                            | 480.4                                            | 62.8 ↑                                         | 70.3                                                                  | 55.3                                                                  | 13.3                                                                         | 431.1                                         | 389.8                                         | 382.3                                            | 397.5                                            | 41.3 ↑                                         | 48.9                                                                  | 33.7                                                                  | 10.6                                                                         |
| Kazakhstan        | 1009.9                                        | 791.4                                         | 777.8                                            | 805.1                                            | 218.5 ↑                                        | 232.1                                                                 | 204.8                                                                 | 27.6                                                                         | 606.6                                         | 498.5                                         | 489.1                                            | 507.9                                            | 108.1 ↑                                        | 117.5                                                                 | 98.7                                                                  | 21.7                                                                         |
| Mauritius         | 816.3                                         | 826.9                                         | 801.8                                            | 852.3                                            | -10.6                                          | 14.5                                                                  | -35.9                                                                 | -1.3                                                                         | 522.6                                         | 571.3                                         | 553.1                                            | 589.6                                            | -48.7 ↓                                        | -30.5                                                                 | -67.0                                                                 | -8.5                                                                         |
| Norway            | 420.3                                         | 408.5                                         | 401.3                                            | 415.7                                            | 11.8 ↑                                         | 19.0                                                                  | 4.5                                                                   | 2.9                                                                          | 370.3                                         | 365.8                                         | 359.0                                            | 372.7                                            | 4.5                                            | 11.3                                                                  | -2.4                                                                  | 1.2                                                                          |
| Peru              | 820.0                                         | 425.2                                         | 418.4                                            | 431.9                                            | 394.8 ↑                                        | 401.6                                                                 | 388.1                                                                 | 92.9                                                                         | 497.9                                         | 335.5                                         | 329.7                                            | 341.4                                            | 162.3 ↑                                        | 168.2                                                                 | 156.5                                                                 | 48.4                                                                         |
| Poland            | 847.1                                         | 718.9                                         | 709.4                                            | 728.5                                            | 128.1 ↑                                        | 137.6                                                                 | 118.6                                                                 | 17.8                                                                         | 515.5                                         | 453.9                                         | 446.6                                            | 461.2                                            | 61.6 ↑                                         | 68.9                                                                  | 54.2                                                                  | 13.6                                                                         |
| Slovenia          | 594.4                                         | 516.8                                         | 501.7                                            | 532.0                                            | 77.6 ↑                                         | 92.7                                                                  | 62.4                                                                  | 15.0                                                                         | 461.7                                         | 398.3                                         | 387.6                                            | 409.0                                            | 63.4 ↑                                         | 74.1                                                                  | 52.7                                                                  | 15.9                                                                         |

|                |        |        |        |        |         |       |       |      |       |       |       |       |        |      |       |      |
|----------------|--------|--------|--------|--------|---------|-------|-------|------|-------|-------|-------|-------|--------|------|-------|------|
| <b>Spain</b>   | 607.0  | 513.2  | 506.6  | 519.8  | 93.8 ↑  | 100.4 | 87.2  | 18.3 | 445.8 | 374.5 | 368.1 | 380.9 | 71.3 ↑ | 77.7 | 64.8  | 19.0 |
| <b>Sweden</b>  | 433.1  | 377.1  | 371.6  | 382.6  | 56.0 ↑  | 61.4  | 50.5  | 14.8 | 359.9 | 328.0 | 322.8 | 333.2 | 31.9 ↑ | 37.1 | 26.7  | 9.7  |
| <b>Ukraine</b> | 1278.4 | 1113.8 | 1007.0 | 1224.3 | 164.6 ↑ | 271.5 | 54.2  | 14.8 | 595.4 | 565.5 | 503.2 | 630.2 | 29.8   | 92.2 | -34.9 | 5.3  |
| <b>USA</b>     | 748.7  | 627.3  | 620.4  | 634.3  | 121.4 ↑ | 128.3 | 114.4 | 19.3 | 558.4 | 478.0 | 472.0 | 484.1 | 80.4 ↑ | 86.4 | 74.3  | 16.8 |

\*For all countries, the sum of observed and expected deaths is up to week 52, with the exception of England & Wales (starting from week 2 up to week 51), Kazakhstan and Mauritius (starting from week 2 up to week 52), and Slovenia (up to 51).

↑ Indicates statistically significant excess all-cause mortality using the sum of deaths for 2020.

↓ Indicates a statistically significant reduction all-cause mortality using the sum of deaths for 2020.

Due to the variability in the provided age groupings by countries, age-standardised mortality values are not entirely comparable between countries and direct comparisons between countries should be avoided.

Table S8. Cumulative observed and expected mortality rate for 2021 by sex.

| Country           | Males                                         |                                               |                                                  |                                                  |                                                |                                                                       |                                                                       |                                                                              | Females                                       |                                               |                                                  |                                                  |                                                |                                                                       |                                                                       |                                                                              |
|-------------------|-----------------------------------------------|-----------------------------------------------|--------------------------------------------------|--------------------------------------------------|------------------------------------------------|-----------------------------------------------------------------------|-----------------------------------------------------------------------|------------------------------------------------------------------------------|-----------------------------------------------|-----------------------------------------------|--------------------------------------------------|--------------------------------------------------|------------------------------------------------|-----------------------------------------------------------------------|-----------------------------------------------------------------------|------------------------------------------------------------------------------|
|                   | Observed mortality rate / 100,000 population* | Expected mortality rate / 100,000 population* | Lower limit of 95% CI of Expected mortality rate | Upper limit of 95% CI of Expected mortality rate | Difference (Observed- Expected mortality rate) | Difference using the Lower limit of 95% CI of Expected mortality rate | Difference using the Upper limit of 95% CI of Expected mortality rate | P-score (the ratio of the excess to the expected, expressed as a percentage) | Observed mortality rate / 100,000 population* | Expected mortality rate / 100,000 population* | Lower limit of 95% CI of Expected mortality rate | Upper limit of 95% CI of Expected mortality rate | Difference (Observed- Expected mortality rate) | Difference using the Lower limit of 95% CI of Expected mortality rate | Difference using the Upper limit of 95% CI of Expected mortality rate | P-score (the ratio of the excess to the expected, expressed as a percentage) |
| Australia         | 418.5                                         | 408.5                                         | 402.9                                            | 414.1                                            | 10.0 ↑                                         | 15.6                                                                  | 4.4                                                                   | 2.5                                                                          | 331.2                                         | 317.6                                         | 312.7                                            | 322.6                                            | 13.6 ↑                                         | 18.6                                                                  | 8.7                                                                   | 4.3                                                                          |
| Austria           | 555.7                                         | 500.7                                         | 490.8                                            | 510.6                                            | 55.0 ↑                                         | 64.9                                                                  | 45.0                                                                  | 11.0                                                                         | 425.0                                         | 399.9                                         | 391.3                                            | 408.7                                            | 25.1 ↑                                         | 33.7                                                                  | 16.3                                                                  | 6.3                                                                          |
| Belgium           | 534.5                                         | 492.9                                         | 484.4                                            | 501.4                                            | 41.6 ↑                                         | 50.1                                                                  | 33.1                                                                  | 8.4                                                                          | 414.0                                         | 405.8                                         | 397.6                                            | 414.1                                            | 8.2                                            | 16.4                                                                  | -0.1                                                                  | 2.0                                                                          |
| Brazil            | 906.3                                         | 691.8                                         | 684.5                                            | 699.1                                            | 214.5 ↑                                        | 221.8                                                                 | 207.2                                                                 | 31.0                                                                         | 599.5                                         | 462.7                                         | 456.7                                            | 468.7                                            | 136.8 ↑                                        | 142.8                                                                 | 130.8                                                                 | 29.6                                                                         |
| Cyprus            | 498.8                                         | 440.3                                         | 422.1                                            | 458.7                                            | 58.6 ↑                                         | 76.8                                                                  | 40.1                                                                  | 13.3                                                                         | 376.1                                         | 327.1                                         | 311.4                                            | 343.1                                            | 49.0 ↑                                         | 64.8                                                                  | 33.1                                                                  | 15.0                                                                         |
| Denmark           | 501.2                                         | 491.9                                         | 484.4                                            | 499.5                                            | 9.2 ↑                                          | 16.8                                                                  | 1.6                                                                   | 1.9                                                                          | 407.2                                         | 392.3                                         | 386.0                                            | 398.7                                            | 14.9 ↑                                         | 21.2                                                                  | 8.5                                                                   | 3.8                                                                          |
| England and Wales | 587.4                                         | 489.4                                         | 480.5                                            | 498.3                                            | 98.0 ↑                                         | 106.8                                                                 | 89.1                                                                  | 20.0                                                                         | 447.5                                         | 398.0                                         | 389.6                                            | 406.5                                            | 49.5 ↑                                         | 57.9                                                                  | 41.0                                                                  | 12.4                                                                         |
| Estonia           | 925.0                                         | 760.1                                         | 739.0                                            | 781.5                                            | 164.9 ↑                                        | 186.1                                                                 | 143.5                                                                 | 21.7                                                                         | 557.2                                         | 463.5                                         | 450.6                                            | 476.4                                            | 93.7 ↑                                         | 106.5                                                                 | 80.7                                                                  | 20.2                                                                         |
| France            | 526.6                                         | 477.9                                         | 471.9                                            | 484.0                                            | 48.7 ↑                                         | 54.8                                                                  | 42.6                                                                  | 10.2                                                                         | 362.3                                         | 343.8                                         | 338.6                                            | 349.0                                            | 18.5 ↑                                         | 23.7                                                                  | 13.4                                                                  | 5.4                                                                          |
| Georgia           | 1341.8                                        | 1020.5                                        | 998.4                                            | 1042.7                                           | 321.4 ↑                                        | 343.5                                                                 | 299.2                                                                 | 31.5                                                                         | 773.3                                         | 555.5                                         | 540.5                                            | 570.6                                            | 217.7 ↑                                        | 232.7                                                                 | 202.6                                                                 | 39.2                                                                         |
| Greece            | 720.1                                         | 606.9                                         | 596.5                                            | 617.3                                            | 113.2 ↑                                        | 123.6                                                                 | 102.8                                                                 | 18.7                                                                         | 541.2                                         | 467.0                                         | 457.1                                            | 476.9                                            | 74.2 ↑                                         | 84.1                                                                  | 64.3                                                                  | 15.9                                                                         |
| Israel            | 491.8                                         | 435.7                                         | 428.1                                            | 443.4                                            | 56.0 ↑                                         | 63.7                                                                  | 48.3                                                                  | 12.9                                                                         | 381.9                                         | 347.2                                         | 340.7                                            | 353.8                                            | 34.7 ↑                                         | 41.2                                                                  | 28.1                                                                  | 10.0                                                                         |
| Italy             | 496.2                                         | 455.9                                         | 448.6                                            | 463.3                                            | 40.3 ↑                                         | 47.7                                                                  | 32.9                                                                  | 8.8                                                                          | 399.7                                         | 376.8                                         | 369.3                                            | 384.3                                            | 22.9 ↑                                         | 30.4                                                                  | 15.4                                                                  | 6.1                                                                          |
| Kazakhstan        | 1244.5                                        | 793.4                                         | 779.7                                            | 807.2                                            | 451.0 ↑                                        | 464.8                                                                 | 437.2                                                                 | 56.8                                                                         | 765.4                                         | 501.2                                         | 491.8                                            | 510.8                                            | 264.2 ↑                                        | 273.6                                                                 | 254.6                                                                 | 52.7                                                                         |
| Mauritius         | 795.7                                         | 829.1                                         | 803.8                                            | 854.7                                            | -33.4 ↓                                        | -8.1                                                                  | -58.9                                                                 | -4.0                                                                         | 507.9                                         | 578.6                                         | 560.2                                            | 597.2                                            | -70.7 ↓                                        | -52.3                                                                 | -89.3                                                                 | -12.2                                                                        |
| Norway            | 414.2                                         | 397.6                                         | 390.5                                            | 404.8                                            | 16.6 ↑                                         | 23.7                                                                  | 9.4                                                                   | 4.2                                                                          | 371.9                                         | 356.2                                         | 349.4                                            | 362.9                                            | 15.8 ↑                                         | 22.5                                                                  | 9.0                                                                   | 4.4                                                                          |
| Peru              | 869.5                                         | 439.0                                         | 431.9                                            | 446.0                                            | 430.5 ↑                                        | 437.5                                                                 | 423.4                                                                 | 98.1                                                                         | 592.9                                         | 345.1                                         | 339.0                                            | 351.2                                            | 247.9 ↑                                        | 254.0                                                                 | 241.7                                                                 | 71.8                                                                         |
| Poland            | 888.8                                         | 707.3                                         | 697.8                                            | 716.9                                            | 181.4 ↑                                        | 190.9                                                                 | 171.9                                                                 | 25.7                                                                         | 556.0                                         | 447.8                                         | 440.5                                            | 455.2                                            | 108.2 ↑                                        | 115.5                                                                 | 100.8                                                                 | 24.2                                                                         |
| Slovenia          | 588.6                                         | 504.2                                         | 489.2                                            | 519.3                                            | 84.4 ↑                                         | 99.4                                                                  | 69.3                                                                  | 16.7                                                                         | 425.4                                         | 392.7                                         | 382.0                                            | 403.4                                            | 32.7 ↑                                         | 43.3                                                                  | 21.9                                                                  | 8.3                                                                          |

|                |        |        |       |        |         |       |       |      |       |       |       |       |         |       |       |      |
|----------------|--------|--------|-------|--------|---------|-------|-------|------|-------|-------|-------|-------|---------|-------|-------|------|
| <b>Spain</b>   | 552.5  | 505.1  | 498.5 | 511.7  | 47.4 ↑  | 53.9  | 40.8  | 9.4  | 394.5 | 368.8 | 362.5 | 375.3 | 25.7 ↑  | 32.0  | 19.2  | 7.0  |
| <b>Sweden</b>  | 394.5  | 361.7  | 356.3 | 367.1  | 32.8 ↑  | 38.1  | 27.4  | 9.1  | 328.3 | 316.2 | 311.1 | 321.4 | 12.1 ↑  | 17.3  | 7.0   | 3.8  |
| <b>Ukraine</b> | 1363.1 | 1106.5 | 999.3 | 1217.3 | 256.7 ↑ | 363.9 | 145.9 | 23.2 | 874.3 | 527.9 | 467.5 | 590.8 | 346.4 ↑ | 406.8 | 283.6 | 65.6 |
| <b>USA</b>     | 765.7  | 624.3  | 617.3 | 631.2  | 141.4 ↑ | 148.3 | 134.4 | 22.6 | 556.4 | 471.7 | 465.7 | 477.8 | 84.7 ↑  | 90.7  | 78.6  | 17.9 |

\*For all countries, the sum of observed and expected deaths is up to week 52, with the exception of England & Wales (starting from week 2 up to week 51), Kazakhstan and Mauritius (starting from week 2 up to week 52), and Slovenia (up to 51).

↑ Indicates statistically significant excess all-cause mortality using the sum of deaths for 2021.

↓ Indicates a statistically significant reduction all-cause mortality using the sum of deaths for 2021.

Due to the variability in the provided age groupings by countries, age-standardised mortality values are not entirely comparable between countries and direct comparisons between countries should be avoided.

**Table S9. Male to female cumulative excess ratio for 2020 and 2021 respectively.**

| Country           | 2020        |               |                     | 2021        |               |                     |
|-------------------|-------------|---------------|---------------------|-------------|---------------|---------------------|
|                   | Male Excess | Female Excess | Ratio Males:Females | Male Excess | Female Excess | Ratio Males:Females |
| Australia         | 2.8         | 1.9           | 1.5                 | 10.0        | 13.6          | 0.7*                |
| Austria           | 59.0        | 36.7          | 1.6                 | 55.0        | 25.1          | 2.2                 |
| Belgium           | 90.1        | 73.1          | 1.2                 | 41.6        | 8.2           | 5.1                 |
| Brazil            | 122.0       | 60.1          | 2.0                 | 214.5       | 136.8         | 1.6                 |
| Cyprus            | 25.4        | 22.3          | 1.1                 | 58.6        | 49.0          | 1.2                 |
| Denmark           | 3.7         | 2.4           | 1.5                 | 9.2         | 14.9          | 0.6*                |
| England and Wales | 109.6       | 62.0          | 1.8                 | 98.0        | 49.5          | 2.0                 |
| Estonia           | 35.9        | 26.4          | 1.4                 | 164.9       | 93.7          | 1.8                 |
| France            | 54.7        | 30.7          | 1.8                 | 48.7        | 18.5          | 2.6                 |
| Georgia           | 138.9       | 67.4          | 2.1                 | 321.4       | 217.7         | 1.5                 |
| Greece            | 44.8        | 37.0          | 1.2                 | 113.2       | 74.2          | 1.5                 |
| Israel            | 44.3        | 22.4          | 2.0                 | 56.0        | 34.7          | 1.6                 |
| Italy             | 62.8        | 41.3          | 1.5                 | 40.3        | 22.9          | 1.8                 |
| Kazakhstan        | 218.5       | 108.1         | 2.0                 | 451.0       | 264.2         | 1.7                 |
| Mauritius         | -10.6       | -48.7         | 0.2*                | -33.4       | -70.7         | 0.5*                |
| Norway            | 11.8        | 4.5           | 2.6                 | 16.6        | 15.8          | 1.1                 |
| Peru              | 394.8       | 162.3         | 2.4                 | 430.5       | 247.9         | 1.7                 |
| Poland            | 128.1       | 61.6          | 2.1                 | 181.4       | 108.2         | 1.7                 |
| Slovenia          | 77.6        | 63.4          | 1.2                 | 84.4        | 32.7          | 2.6                 |
| Spain             | 93.8        | 71.3          | 1.3                 | 47.4        | 25.7          | 1.8                 |
| Sweden            | 56.0        | 31.9          | 1.8                 | 32.8        | 12.1          | 2.7                 |
| Ukraine           | 164.6       | 29.8          | 5.5                 | 256.7       | 346.4         | 0.7*                |
| USA               | 121.4       | 80.4          | 1.5                 | 141.4       | 84.7          | 1.7                 |

For all countries, the sum of observed and expected deaths is up to week 52, with the exception of England & Wales (starting from week 2 up to week 51), Kazakhstan and Mauritius (starting from week 2 up to week 52), and Slovenia (up to 51).

\*Indicates females are more affected than males.

Due to the variability in the provided age groupings by countries, age-standardised mortality values are not entirely comparable between countries and direct comparisons between countries should be avoided.

**Table S10. Cumulative observed and expected mortality rate for 2020 by age group.**

| Country           | Observed mortality rate / 100,000 population* | Expected mortality rate / 100,000 population* | Lower limit of 95% CI of Expected mortality rate | Upper limit of 95% CI of Expected mortality rate | Difference (Observed -Expected mortality rate) | Difference using the Lower limit of 95% CI of Expected mortality rate | Difference using the Upper limit of 95% CI of Expected mortality rate | P-score (the ratio of the excess to the expected, expressed as a percentage) | Observed mortality rate / 100,000 population* | Expected mortality rate / 100,000 population* | Lower limit of 95% CI of Expected mortality rate | Upper limit of 95% CI of Expected mortality rate | Difference (Observed -Expected mortality rate) | Difference using the Lower limit of 95% CI of Expected mortality rate | Difference using the Upper limit of 95% CI of Expected mortality rate | P-score (the ratio of the excess to the expected, expressed as a percentage) |
|-------------------|-----------------------------------------------|-----------------------------------------------|--------------------------------------------------|--------------------------------------------------|------------------------------------------------|-----------------------------------------------------------------------|-----------------------------------------------------------------------|------------------------------------------------------------------------------|-----------------------------------------------|-----------------------------------------------|--------------------------------------------------|--------------------------------------------------|------------------------------------------------|-----------------------------------------------------------------------|-----------------------------------------------------------------------|------------------------------------------------------------------------------|
| <b>&lt;65</b>     |                                               |                                               |                                                  |                                                  |                                                |                                                                       |                                                                       | <b>65+</b>                                                                   |                                               |                                               |                                                  |                                                  |                                                |                                                                       |                                                                       |                                                                              |
| Australia         | 136.2                                         | 135.0                                         | 131.8                                            | 138.2                                            | 1.2                                            | 4.4                                                                   | -2.0                                                                  | 0.9                                                                          | 3252.3                                        | 3237.0                                        | 3204.2                                           | 3270.0                                           | 15.2                                           | 48.1                                                                  | -17.7                                                                 | 0.5                                                                          |
| Austria           | 179.8                                         | 168.5                                         | 164.9                                            | 172.1                                            | 11.4↑                                          | 14.9                                                                  | 7.8                                                                   | 6.7                                                                          | 4670.1                                        | 4185.9                                        | 4097.1                                           | 4275.3                                           | 484.2↑                                         | 573.0                                                                 | 394.7                                                                 | 11.6                                                                         |
| Belgium           | 458.0                                         | 408.2                                         | 399.7                                            | 416.9                                            | 49.7↑                                          | 58.3                                                                  | 41.1                                                                  | 12.2                                                                         | 5010.0                                        | 4152.8                                        | 4072.3                                           | 4233.9                                           | 857.2↑                                         | 937.7                                                                 | 776.1                                                                 | 20.6                                                                         |
| Brazil            | 315.5                                         | 272.3                                         | 267.7                                            | 276.8                                            | 43.2↑                                          | 47.8                                                                  | 38.7                                                                  | 15.9                                                                         | 4857.2                                        | 4206.7                                        | 4172.1                                           | 4241.4                                           | 650.5↑                                         | 685.1                                                                 | 615.8                                                                 | 15.5                                                                         |
| Cyprus            | 136.7                                         | 126.0                                         | 117.4                                            | 134.8                                            | 10.7↑                                          | 19.3                                                                  | 1.9                                                                   | 8.5                                                                          | 3751.6                                        | 3551.4                                        | 3426.0                                           | 3678.4                                           | 200.1↑                                         | 325.5                                                                 | 73.2                                                                  | 5.6                                                                          |
| Denmark           | 167.2                                         | 166.1                                         | 162.0                                            | 170.3                                            | 1.1                                            | 5.3                                                                   | -3.0                                                                  | 0.7                                                                          | 4064.7                                        | 4047.7                                        | 3993.5                                           | 4102.2                                           | 17.0                                           | 71.2                                                                  | -37.5                                                                 | 0.4                                                                          |
| England and Wales | 190.9                                         | 169.2                                         | 165.6                                            | 172.9                                            | 21.7↑                                          | 25.3                                                                  | 18.0                                                                  | 12.8                                                                         | 4691.9                                        | 3992.3                                        | 3906.3                                           | 4078.8                                           | 699.6↑                                         | 785.6                                                                 | 613.1                                                                 | 17.5                                                                         |
| Estonia           | 292.4                                         | 261.8                                         | 250.4                                            | 273.3                                            | 30.6↑                                          | 42.0                                                                  | 19.1                                                                  | 11.7                                                                         | 4804.8                                        | 4717.7                                        | 4608.9                                           | 4827.2                                           | 87.2                                           | 195.9                                                                 | -22.4                                                                 | 1.8                                                                          |
| Georgia           | 393.3                                         | 355.1                                         | 347.0                                            | 363.3                                            | 38.2↑                                          | 46.4                                                                  | 30.0                                                                  | 10.8                                                                         | 6994.2                                        | 6170.9                                        | 6017.2                                           | 6325.9                                           | 823.3↑                                         | 977.0                                                                 | 668.3                                                                 | 13.3                                                                         |
| Greece            | 1125.3                                        | 1055.5                                        | 1036.4                                           | 1074.7                                           | 69.8↑                                          | 88.9                                                                  | 50.6                                                                  | 6.6                                                                          | 4975.7                                        | 4596.8                                        | 4499.5                                           | 4694.8                                           | 378.9↑                                         | 476.2                                                                 | 280.9                                                                 | 8.2                                                                          |
| Israel            | 109.5                                         | 107.4                                         | 104.6                                            | 110.3                                            | 2.1                                            | 5.0                                                                   | -0.8                                                                  | 2.0                                                                          | 4013.3                                        | 3642.3                                        | 3584.8                                           | 3700.1                                           | 371.0↑                                         | 428.5                                                                 | 313.2                                                                 | 10.2                                                                         |
| Italy             | 159.1                                         | 149.6                                         | 146.3                                            | 153.0                                            | 9.5↑                                           | 12.8                                                                  | 6.1                                                                   | 6.3                                                                          | 4696.0                                        | 4122.1                                        | 4043.3                                           | 4201.3                                           | 573.9↑                                         | 652.7                                                                 | 494.7                                                                 | 13.9                                                                         |

|                  |        |        |        |        |        |       |        |      |        |        |        |        |         |        |         |      |
|------------------|--------|--------|--------|--------|--------|-------|--------|------|--------|--------|--------|--------|---------|--------|---------|------|
| Northern Ireland | 196.6  | 182.4  | 174.2  | 190.7  | 14.2↑  | 22.3  | 5.8    | 7.8  | 4486.4 | 4028.4 | 3902.5 | 4155.6 | 458.0↑  | 583.9  | 330.7   | 11.4 |
| Norway           | 124.3  | 121.8  | 118.3  | 125.4  | 2.4    | 6.0   | -1.1   | 2.0  | 3727.5 | 3652.4 | 3597.8 | 3707.3 | 75.1↑   | 129.7  | 20.2    | 2.1  |
| Peru             | 255.9  | 151.3  | 147.9  | 154.8  | 104.6↑ | 108.0 | 101.1  | 69.1 | 4970.3 | 2877.3 | 2832.4 | 2922.4 | 2093.1↑ | 2138.0 | 2047.9  | 72.7 |
| Poland           | 324.8  | 300.9  | 296.1  | 305.7  | 23.9↑  | 28.7  | 19.1   | 8.0  | 5396.9 | 4481.0 | 4404.9 | 4557.5 | 915.9↑  | 991.9  | 839.3   | 20.4 |
| Slovenia         | 195.2  | 187.9  | 180.9  | 194.9  | 7.3↑   | 14.3  | 0.3    | 3.9  | 4853.7 | 4089.4 | 3996.1 | 4183.4 | 764.3↑  | 857.5  | 670.3   | 18.7 |
| Spain            | 944.7  | 833.5  | 824.3  | 842.8  | 111.1↑ | 120.3 | 101.9  | 13.3 | 4661.5 | 3837.6 | 3771.7 | 3903.8 | 823.9↑  | 889.7  | 757.7   | 21.5 |
| USA              | 314.9  | 263.4  | 258.9  | 267.9  | 51.5↑  | 56.0  | 47.0   | 19.5 | 4644.9 | 3950.1 | 3920.5 | 3979.8 | 694.8↑  | 724.4  | 665.1   | 17.6 |
| <b>&lt;70</b>    |        |        |        |        |        |       |        |      |        |        |        |        |         |        |         |      |
| <b>70+</b>       |        |        |        |        |        |       |        |      |        |        |        |        |         |        |         |      |
| Cyprus           | 180.8  | 171.3  | 161.4  | 181.4  | 9.5    | 19.4  | -0.6   | 5.6  | 5028.0 | 4816.0 | 4639.6 | 4994.6 | 211.9↑  | 388.4  | 33.3    | 4.4  |
| Denmark          | 242.6  | 240.5  | 235.8  | 245.3  | 2.1    | 6.9   | -2.7   | 0.9  | 5090.7 | 5004.5 | 4931.8 | 5077.6 | 86.1↑   | 158.9  | 13.1    | 1.7  |
| Estonia          | 399.5  | 361.9  | 350.0  | 373.9  | 37.6↑  | 49.5  | 25.5   | 10.4 | 5957.7 | 5875.4 | 5734.9 | 6017.0 | 82.3    | 222.8  | -59.2   | 1.4  |
| France           | 258.8  | 242.6  | 238.3  | 247.0  | 16.1↑  | 20.4  | 11.8   | 6.6  | 5429.7 | 4835.1 | 4755.2 | 4915.4 | 594.7↑  | 674.5  | 514.4   | 12.3 |
| Georgia          | 522.3  | 466.1  | 456.3  | 475.9  | 56.2↑  | 65.9  | 46.4   | 12.1 | 9247.0 | 8306.7 | 8093.7 | 8521.5 | 940.3↑  | 1153.2 | 725.5   | 11.3 |
| Italy            | 223.1  | 204.8  | 200.9  | 208.8  | 18.3↑  | 22.2  | 14.3   | 8.9  | 5907.8 | 5164.9 | 5063.2 | 5267.2 | 743.0↑  | 844.6  | 640.6   | 14.4 |
| Kazakhstan       | 403.6  | 316.5  | 311.2  | 321.9  | 87.1↑  | 92.4  | 81.7   | 27.5 | 5292.3 | 4656.5 | 6286.9 | 6532.2 | 635.8↓  | -994.6 | -1239.9 | 13.7 |
| Mauritius        | 469.5  | 485.7  | 471.8  | 499.8  | -16.2↓ | -2.3  | -30.3  | -3.3 | 8573.1 | 7074.6 | 5954.9 | 6380.9 | 1498.5↑ | 2618.2 | 2192.2  | 21.2 |
| Norway           | 174.3  | 168.9  | 164.8  | 173.1  | 5.4    | 9.6   | 1.3    | 3.2  | 4855.0 | 4723.9 | 4648.7 | 4799.4 | 131.1↑  | 206.3  | 55.6    | 2.8  |
| Peru             | 317.5  | 176.6  | 172.9  | 180.4  | 140.9↑ | 144.6 | 137.1  | 79.8 | 6420.7 | 3901.9 | 3840.5 | 3963.6 | 2518.8↑ | 2580.2 | 2457.1  | 64.6 |
| Poland           | 464.0  | 424.4  | 418.8  | 430.2  | 39.6↑  | 45.3  | 33.9   | 9.3  | 7142.9 | 5922.0 | 5815.8 | 6028.8 | 1220.9↑ | 1327.1 | 1114.1  | 20.6 |
| Sweden           | 169.3  | 154.8  | 151.4  | 158.3  | 14.5↑  | 17.9  | 11.0   | 9.3  | 5292.3 | 4656.5 | 4589.7 | 4723.7 | 635.8↑  | 702.7  | 568.6   | 13.7 |
| Ukraine          | 1395.0 | 1384.0 | 1243.0 | 1530.0 | 11.0   | 152.0 | -135.0 | 0.8  | 8573.1 | 7074.6 | 6491.7 | 7673.9 | 1498.5↑ | 2081.4 | 899.2   | 21.2 |



\*For all countries, the sum of observed and expected deaths is up to week 52, with the exception of England & Wales (starting from week 2 up to week 51), Kazakhstan and Mauritius (starting from week 2 up to week 52), Northern Ireland (up to week 50), and Slovenia (up to 51).

↑ Indicates statistically significant excess all-cause mortality using the sum of deaths for 2021.

↓ Indicates a statistically significant reduction all-cause mortality using the sum of deaths for 2021.

Due to the variability in the provided age groupings by countries, age-standardised mortality values are not entirely comparable between countries and direct comparisons between countries should be avoided.

**Table S11. Cumulative observed and expected mortality rate for the whole year 2021 by age group.**

| Country           | Observed mortality rate / 100,000 population* | Expected mortality rate / 100,000 population* | Lower limit of 95% CI of Expected mortality rate | Upper limit of 95% CI of Expected mortality rate | Difference (Observed -Expected mortality rate) | Difference using the Lower limit of 95% CI of Expected mortality rate | Difference using the Upper limit of 95% CI of Expected mortality rate | P-score (the ratio of the excess to the expected, expressed as a percentage) | Observed mortality rate / 100,000 population* | Expected mortality rate / 100,000 population* | Lower limit of 95% CI of Expected mortality rate | Upper limit of 95% CI of Expected mortality rate | Difference (Observed -Expected mortality rate) | Difference using the Lower limit of 95% CI of Expected mortality rate | Difference using the Upper limit of 95% CI of Expected mortality rate | P-score (the ratio of the excess to the expected, expressed as a percentage) |
|-------------------|-----------------------------------------------|-----------------------------------------------|--------------------------------------------------|--------------------------------------------------|------------------------------------------------|-----------------------------------------------------------------------|-----------------------------------------------------------------------|------------------------------------------------------------------------------|-----------------------------------------------|-----------------------------------------------|--------------------------------------------------|--------------------------------------------------|------------------------------------------------|-----------------------------------------------------------------------|-----------------------------------------------------------------------|------------------------------------------------------------------------------|
|                   | <b>&lt;65</b>                                 |                                               |                                                  |                                                  |                                                |                                                                       |                                                                       |                                                                              | <b>65+</b>                                    |                                               |                                                  |                                                  |                                                |                                                                       |                                                                       |                                                                              |
| Australia         | 132.4                                         | 133.2                                         | 130.0                                            | 136.4                                            | -0.8                                           | 2.4                                                                   | -4.0                                                                  | -0.6                                                                         | 3313.8                                        | 3159.4                                        | 3126.7                                           | 3192.1                                           | 154.5↑                                         | 187.1                                                                 | 121.7                                                                 | 4.9                                                                          |
| Austria           | 185.7                                         | 166.2                                         | 162.7                                            | 169.8                                            | 19.4↑                                          | 23.0                                                                  | 15.8                                                                  | 11.7                                                                         | 4482.1                                        | 4149.3                                        | 4060.4                                           | 4239.0                                           | 332.7↑                                         | 421.7                                                                 | 243.1                                                                 | 8.0                                                                          |
| Belgium           | 538.8                                         | 489.6                                         | 479.5                                            | 499.8                                            | 49.2↑                                          | 59.4                                                                  | 39.0                                                                  | 10.1                                                                         | 4243.2                                        | 4081.0                                        | 4000.7                                           | 4161.9                                           | 162.1↑                                         | 242.5                                                                 | 81.3                                                                  | 4.0                                                                          |
| Brazil            | 379.1                                         | 269.7                                         | 265.2                                            | 274.3                                            | 109.4↑                                         | 113.9                                                                 | 104.8                                                                 | 40.5                                                                         | 5183.4                                        | 4151.5                                        | 4116.9                                           | 4186.2                                           | 1031.9↑                                        | 1066.5                                                                | 997.2                                                                 | 24.9                                                                         |
| Cyprus            | 138.0                                         | 126.1                                         | 117.4                                            | 134.9                                            | 11.9↑                                          | 20.5                                                                  | 3.1                                                                   | 9.4                                                                          | 4012.1                                        | 3483.9                                        | 3358.9                                           | 3610.4                                           | 528.2↑                                         | 653.2                                                                 | 401.8                                                                 | 15.2                                                                         |
| Denmark           | 164.5                                         | 161.9                                         | 157.8                                            | 166.0                                            | 2.6                                            | 6.7                                                                   | -1.5                                                                  | 1.6                                                                          | 4158.6                                        | 4039.1                                        | 3984.6                                           | 4093.9                                           | 119.4↑                                         | 174.0                                                                 | 64.6                                                                  | 3.0                                                                          |
| England and Wales | 196.1                                         | 168.6                                         | 164.9                                            | 172.3                                            | 27.4↑                                          | 31.1                                                                  | 23.7                                                                  | 16.3                                                                         | 4401.1                                        | 3912.5                                        | 3826.9                                           | 3998.7                                           | 488.6↑                                         | 574.2                                                                 | 402.4                                                                 | 12.5                                                                         |
| Estonia           | 314.0                                         | 249.8                                         | 238.7                                            | 261.1                                            | 64.2↑                                          | 75.4                                                                  | 52.9                                                                  | 25.7                                                                         | 5576.1                                        | 4688.5                                        | 4579.4                                           | 4798.5                                           | 887.6↑                                         | 996.7                                                                 | 777.6                                                                 | 18.9                                                                         |

|                  |        |        |        |        |        |       |       |       |         |        |        |        |         |        |        |      |
|------------------|--------|--------|--------|--------|--------|-------|-------|-------|---------|--------|--------|--------|---------|--------|--------|------|
| Georgia          | 455.6  | 345.2  | 337.1  | 353.4  | 110.4↑ | 118.5 | 102.3 | 32.0  | 8168.7  | 6013.0 | 5860.4 | 6166.9 | 2155.7↑ | 2308.3 | 2001.8 | 35.9 |
| Greece           | 1296.2 | 1053.3 | 1034.1 | 1072.6 | 242.9↑ | 262.1 | 223.6 | 23.1  | 5297.6  | 4586.9 | 4489.1 | 4685.4 | 710.7↑  | 808.5  | 612.2  | 15.5 |
| Israel           | 112.4  | 105.0  | 102.2  | 107.9  | 7.3↑   | 10.2  | 4.5   | 7.0   | 4009.5  | 3543.0 | 3486.0 | 3600.3 | 466.6↑  | 523.6  | 409.2  | 13.2 |
| Italy            | 159.0  | 145.2  | 141.8  | 148.5  | 13.9↑  | 17.2  | 10.5  | 9.6   | 4275.2  | 3987.4 | 3909.5 | 4065.9 | 287.7↑  | 365.7  | 209.3  | 7.2  |
| Northern Ireland | 205.9  | 181.3  | 173.1  | 189.7  | 24.5↑  | 32.7  | 16.2  | 13.5  | 4410.9  | 3951.3 | 3825.9 | 4078.1 | 459.6↑  | 585.0  | 332.8  | 11.6 |
| Norway           | 121.7  | 118.9  | 115.4  | 122.4  | 2.8    | 6.3   | -0.7  | 2.4   | 3733.0  | 3556.5 | 3502.3 | 3611.0 | 176.4↑  | 230.6  | 122.0  | 5.0  |
| Peru             | 308.4  | 156.1  | 152.5  | 159.7  | 152.3↑ | 155.9 | 148.7 | 97.6  | 5285.3  | 2971.9 | 2925.0 | 3019.0 | 2313.4↑ | 2360.2 | 2266.3 | 77.8 |
| Poland           | 357.0  | 296.5  | 291.7  | 301.3  | 60.5↑  | 65.3  | 55.7  | 20.4  | 5650.7  | 4412.4 | 4336.5 | 4488.8 | 1238.3↑ | 1314.2 | 1161.9 | 28.1 |
| Slovenia         | 206.1  | 182.0  | 175.1  | 189.0  | 24.1↑  | 31.0  | 17.1  | 13.2  | 4503.0  | 4037.5 | 3944.2 | 4131.4 | 465.5↑  | 558.7  | 371.5  | 11.5 |
| Spain            | 930.4  | 833.3  | 824.1  | 842.6  | 97.0↑  | 106.3 | 87.7  | 11.6  | 4078.3  | 3766.6 | 3701.0 | 3832.6 | 311.7↑  | 377.3  | 245.7  | 8.3  |
| USA              | 345.6  | 263.9  | 259.4  | 268.5  | 81.7↑  | 86.2  | 77.2  | 31.0  | 4423.9  | 3891.1 | 3861.5 | 3920.7 | 532.8↑  | 562.4  | 503.2  | 13.7 |
| <b>&lt;70</b>    |        |        |        |        |        |       |       |       |         |        |        |        |         |        |        |      |
| <b>70+</b>       |        |        |        |        |        |       |       |       |         |        |        |        |         |        |        |      |
| Cyprus           | 189.4  | 170.6  | 160.7  | 180.8  | 18.8↑  | 28.7  | 8.7   | 11.0  | 5308.5  | 4707.9 | 4532.5 | 4885.5 | 600.6↑  | 776.0  | 423.0  | 12.8 |
| Denmark          | 238.6  | 235.3  | 230.6  | 240.1  | 3.2    | 8.0   | -1.5  | 1.4   | 5214.4  | 4924.9 | 4852.4 | 4997.8 | 289.5↑  | 362.1  | 216.6  | 5.9  |
| Estonia          | 355.8  | 351.0  | 339.2  | 362.9  | 4.8    | 16.6  | -7.1  | 1.4   | 6376.7  | 5832.3 | 5691.5 | 5974.3 | 544.4↑  | 685.2  | 402.4  | 9.3  |
| France           | 257.8  | 238.1  | 233.8  | 242.4  | 19.7↑  | 24.0  | 15.4  | 8.3   | 5100.4  | 4725.2 | 4645.8 | 4805.0 | 375.2↑  | 454.6  | 295.4  | 7.9  |
| Georgia          | 613.0  | 457.3  | 447.6  | 467.0  | 155.7↑ | 165.4 | 146.0 | 34.1  | 10793.0 | 8170.3 | 7957.9 | 8384.6 | 2622.7↑ | 2835.1 | 2408.4 | 32.1 |
| Italy            | 221.4  | 197.3  | 193.4  | 201.2  | 24.1↑  | 28.0  | 20.2  | 12.2  | 5360.1  | 4970.0 | 4869.7 | 5071.0 | 390.1↑  | 490.4  | 289.1  | 7.8  |
| Kazakhstan       | 509.2  | 319.2  | 313.8  | 324.6  | 190.0↑ | 195.4 | 184.7 | 59.5  | 9532.4  | 6431.2 | 6307.9 | 6555.2 | 3101.2↑ | 3224.5 | 2977.1 | 48.2 |
| Mauritius        | 471.0  | 499.7  | 485.5  | 514.1  | -28.7↓ | -14.5 | -43.1 | -5.7  | 5519.3  | 6126.8 | 5914.4 | 6341.6 | -607.4↓ | -395.1 | -822.3 | -9.9 |
| Norway           | 171.0  | 163.9  | 159.8  | 168.1  | 7.0↑   | 11.1  | 2.9   | 4.3   | 4863.9  | 4554.3 | 4480.1 | 4628.8 | 309.7↑  | 383.8  | 235.1  | 6.8  |
| Peru             | 371.1  | 182.7  | 178.8  | 186.7  | 188.4↑ | 192.3 | 184.5 | 103.1 | 6804.7  | 4036.3 | 3972.2 | 4100.7 | 2768.4↑ | 2832.5 | 2703.9 | 68.6 |
| Poland           | 419.2  | 430.6  | 515.1  | 424.9  | -11.5↓ | -95.9 | -5.7  | -2.7  | 7375.2  | 5826.4 | 5720.4 | 5933.0 | 1548.9↑ | 1654.8 | 1442.3 | 26.6 |

|                |        |        |        |        |         |        |        |      |        |        |        |        |        |        |       |      |
|----------------|--------|--------|--------|--------|---------|--------|--------|------|--------|--------|--------|--------|--------|--------|-------|------|
| <b>Sweden</b>  | 161.2  | 147.0  | 143.7  | 150.4  | 14.2↑   | 17.5   | 10.8   | 9.6  | 4741.2 | 4496.7 | 4430.6 | 4563.0 | 244.5↑ | 310.6  | 178.2 | 5.4  |
| <b>Ukraine</b> | 2419.0 | 1258.8 | 1124.0 | 1398.7 | 1160.2↑ | 1295.0 | 1020.3 | 92.2 | 8055.7 | 7125.3 | 6536.3 | 7730.9 | 930.5↑ | 1519.4 | 324.8 | 13.1 |

\*For all countries, the sum of observed and expected deaths is up to week 52, with the exception of England & Wales (starting from week 2 up to week 51), Kazakhstan and Mauritius (starting from week 2 up to week 52), Northern Ireland (up to week 50), and Slovenia (up to 51).

↑ Indicates statistically significant excess all-cause mortality using the sum of deaths for 2021.

↓ Indicates a statistically significant reduction all-cause mortality using the sum of deaths for 2021.

Due to the variability in the provided age groupings by countries, age-standardised mortality values are not entirely comparable between countries and direct comparisons between countries should be avoided.

Table S12. The mean of sociodemographic determinants of excess mortality for each country 2020-2021

|                            | Population density | Median age | % of population aged 65+ | Life Expectancy | Hypertension prevalence (2019) | Diabetes prevalence (2019) | Obesity prevalence (2019) | PM2.5 air pollution | GDP       | HDI   | IDHI  | Gini index | Government Effectiveness | Government revenue | Hospital beds per 1,000 population | Medical Doctors per 1,000 population | Nursing Personnel per 1,000 population | UHC    | Completeness of vital registration systems | Healthcare Access and Quality (HAQ) |
|----------------------------|--------------------|------------|--------------------------|-----------------|--------------------------------|----------------------------|---------------------------|---------------------|-----------|-------|-------|------------|--------------------------|--------------------|------------------------------------|--------------------------------------|----------------------------------------|--------|--------------------------------------------|-------------------------------------|
| <b>Australia</b>           | 3.359              | 36.806     | 16.42                    | 83.2            | 29.3                           | 6.4                        | 29                        | 8.550               | 49261.096 | 0.951 | 0.876 | 34.3       | 1.562                    | 35.261             | 3.84                               | 41.02                                | 136.3                                  | 89.423 | 100                                        | 90.18                               |
| <b>Austria</b>             | 108.0              | 42.669     | 19.31                    | 81.193          | 33.8                           | 4.6                        | 20.1                      | 12.478              | 53054.781 | 0.916 | 0.851 | 30.2       | 1.646                    | 49.379             | 7.05                               | 54.10                                | 104.9                                  | 86.370 | 100                                        | 87.97                               |
| <b>Belgium</b>             | 382.7              | 40.823     | 19.32                    | 80.795          | 30                             | 3.6                        | 22.1                      | 77.84               | 50359.236 | 0.937 | 0.874 | 27.2       | 1.121                    | 49.930             | 5.519                              | 48.60                                | 191.0                                  | 87.301 | 99.8                                       | 86.6                                |
| <b>Brazil</b>              | 25.58              | 32.616     | 9.448                    | 76.084          | 45                             | 8.8                        | 22.1                      | 12.707              | 14307.155 | 0.754 | 0.576 | 48.9       | -0.449                   | 31.53              | 2.09                               | 21.42                                | 55.13                                  | 64.828 | 99.3                                       | 52.97                               |
| <b>Cyprus</b>              | 134.3              | 37.344     | 14.32                    | 81.135          | 30.8                           | 8.6                        | 21.8                      | 17.294              | 40579.396 | 0.896 | 0.819 | 31.2       | 0.806                    | 42.44              | 3.4                                | 53.75                                | 42.82                                  | 99.897 | 90.7                                       | 86.17                               |
| <b>Denmark</b>             | 137.8              | 137.753    | 20.17                    | 81.551          | 35.9                           | 5.3                        | 19.7                      | 10.029              | 56740.62  | 0.948 | 0.898 | 27.7       | 1.943                    | 54.094             | 2.552                              | 42.64                                | 101.6                                  | 84.140 | 100                                        | 85.54                               |
| <b>England &amp; Wales</b> | 276.8              | 39.543     | 18.83                    | 80.902          | 26.4                           | 6.3                        | 27.8                      | 10.473              | 43481.410 | 0.929 | 0.85  | 35.1       | 1.324                    | 39.814             | 2.382                              | 31.11                                | 85.87                                  | 67.157 | 100                                        | 83.34                               |
| <b>Estonia</b>             | 30.58              | 41.423     | 20.28                    | 78.346          | 40.2                           | 6.5                        | 21.2                      | 6.732               | 37300.481 | 0.89  | 0.829 | 30.8       | 1.359                    | 39.224             | 4.46                               | 38.63                                | 91.86                                  | 82.040 | 100                                        | 76.45                               |
| <b>France</b>              | 117.0              | 41.497     | 21.18                    | 82.175          | 29.1                           | 5.3                        | 21.6                      | 11.815              | 43613.133 | 0.903 | 0.825 | 32.4       | 1.253                    | 52.510             | 5.73                               | 33.24                                | 118.5                                  | 90.766 | 100                                        | 88.02                               |

|                         |       |        |       |        |      |      |      |        |           |       |       |      |        |             |       |       |       |        |      |       |
|-------------------------|-------|--------|-------|--------|------|------|------|--------|-----------|-------|-------|------|--------|-------------|-------|-------|-------|--------|------|-------|
| <b>Georgia</b>          | 54.13 | 36.334 | 14.53 | 73.919 | 44.5 | 5.7  | 21.7 | 22.196 | 14726.493 | 0.802 | 0.706 | 34.5 | 0.132  | 25.42       | 2.89  | 51.32 | 58.17 | 55.953 | 94.3 | 57.71 |
| <b>Greece</b>           | 80.08 | 44.545 | 22.36 | 81.088 | 31.3 | 6.4  | 24.9 | 16.218 | 28325.790 | 0.887 | 0.791 | 33.1 | 0.441  | 49.877      | 4.18  | 63.06 | 34.28 | 80.140 | 100  | 83.88 |
| <b>Israel</b>           | 408.2 | 29.018 | 11.87 | 82.699 | 29.1 | 8.5  | 26.1 | 21.381 | 40706.568 | 0.919 | 0.815 | 38.6 | 1.190  | 41.605      | 2.915 | 36.22 | 53.84 | 81.384 | 100  | 83.08 |
| <b>Italy</b>            | 200.6 | 46.626 | 23.54 | 82.344 | 33.8 | 6.4  | 19.9 | 16.751 | 40497.357 | 0.895 | 0.791 | 35.2 | 0.377  | 47.714      | 3.19  | 40.66 | 62.65 | 88.895 | 100  | 89.6  |
| <b>Kazakhstan</b>       | 7.071 | 29.515 | 7.898 | 71.370 | 41.9 | 6.6  | 21   | 13.824 | 25736.019 | 0.811 | 0.755 | 27.8 | 0.101  | 14.94       | 6.06  | 40.28 | 66.55 | 59.237 | 88.3 | 59.47 |
| <b>Northern Ireland</b> | 276.8 | 39.543 | 18.83 | 80.902 | 26.4 | 6.3  | 27.8 | 10.473 | 43481.410 | 0.929 | 0.85  | 35.1 | 1.324  | 39.814      | 2.381 | 31.12 | 85.88 | 67.157 | 100  | 83.34 |
| <b>Norway</b>           | 17.72 | 39.186 | 17.93 | 83.210 | 30.5 | 3.6  | 23.1 | 6.956  | 64605.088 | 0.961 | 0.908 | 27.7 | 1.883  | 57.567      | 3.4   | 51.30 | 181.9 | 94.241 | 100  | 90.4  |
| <b>Peru</b>             | 26.19 | 28.076 | 8.289 | 76.947 | 20.7 | 4.8  | 19.7 | 24.787 | 11845.785 | 0.762 | 0.635 | 43.8 | -0.262 | 21          | 1.59  | 16.46 | 19.89 | 75.759 | 64.4 | 60    |
| <b>Poland</b>           | 125.3 | 40.701 | 18.62 | 76.600 | 49.2 | 6.8  | 23.1 | 20.878 | 33731.175 | 0.876 | 0.816 | 30.2 | 0.326  | 41.849      | 6.19  | 37.14 | 60.27 | 72.656 | 100  | 73.2  |
| <b>Slovenia</b>         | 105.2 | 43.055 | 20.32 | 80.532 | 45.3 | 5.8  | 20.2 | 16.024 | 38567.302 | 0.918 | 0.878 | 24.4 | 1.168  | 44.028      | 4.28  | 32.79 | 103.9 | 89.834 | 94.8 | 87.8  |
| <b>Spain</b>            | 94.42 | 43.688 | 19.80 | 82.334 | 27.2 | 10.3 | 23.8 | 9.698  | 36940.484 | 0.905 | 0.788 | 34.3 | 0.917  | 42.78317416 | 2.95  | 45.77 | 61.04 | 90.006 | 100  | 89.67 |
| <b>Sweden</b>           | 25.59 | 39.502 | 20.07 | 82.407 | 30.2 | 5    | 20.6 | 6.184  | 52472.352 | 0.947 | 0.885 | 29.3 | 1.681  | 49.316      | 2.05  | 70.62 | 203   | 90.361 | 100  | 90.38 |
| <b>Ukraine</b>          | 75.44 | 40.638 | 17.30 | 71.185 | 43.1 | 5.6  | 24.1 | 20.310 | 12675.702 | 0.773 | 0.726 | 25.6 | -0.396 | 36.94       | 7.46  | 29.9  | 62.95 | 63.812 | 100  | 63.05 |
| <b>USA</b>              | 36.7  | 37.575 | 16.4  | 77.28  | 31.  | 10.  | 36.  | 7.409  | 61918.78  | 0.92  | 0.81  | 41.  | 1.32   | 32.660      | 2.8   | 35.5  | 124.  | 82.13  | 99.  | 80.5  |

|  |   |  |   |   |   |   |   |  |  |   |   |   |   |  |  |   |   |   |   |   |
|--|---|--|---|---|---|---|---|--|--|---|---|---|---|--|--|---|---|---|---|---|
|  | 9 |  | 7 | 0 | 6 | 7 | 2 |  |  | 1 | 9 | 5 | 3 |  |  | 5 | 7 | 8 | 9 | 8 |
|--|---|--|---|---|---|---|---|--|--|---|---|---|---|--|--|---|---|---|---|---|

\*Recent data from reliable sources was not available for Mauritius. Peru and Kazakhstan are included here for descriptive purposes, but were excluded from the analyses of determinants of excess mortality due to a completeness of vital registration systems of <90%.

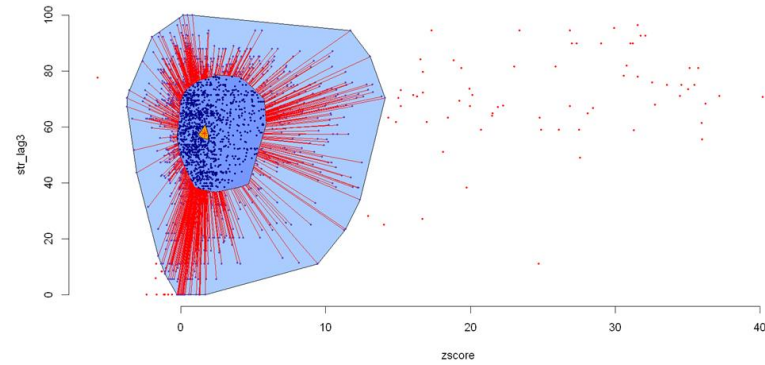

**Figure S1. Bag plot of the observations in 2020 and 2021, regarding z-score and Stringency of control measures (3-week lag).** In the bag plot, half of the data is in the dark blue polygon (interior polygon) and the outer polygon is used to identify outliers.

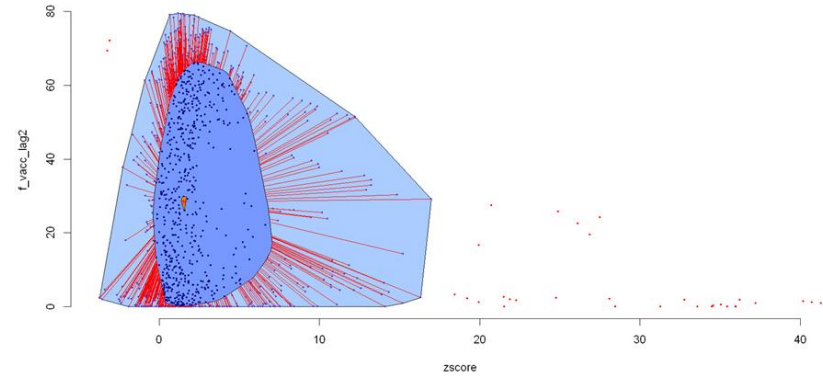

Figure S2. Bag plot of the observations in 2021, regarding z-score and fully vaccinated per 100 population (2-week lag).



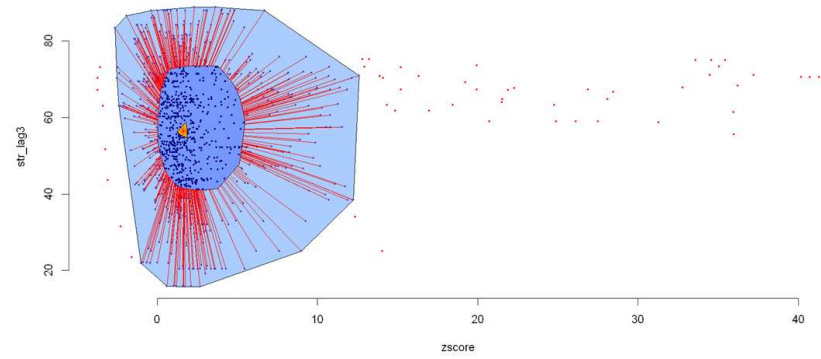

**Figure S3. Bag plot of the observations in 2021, regarding z-score and Stringency of control measures (3-week lag).**

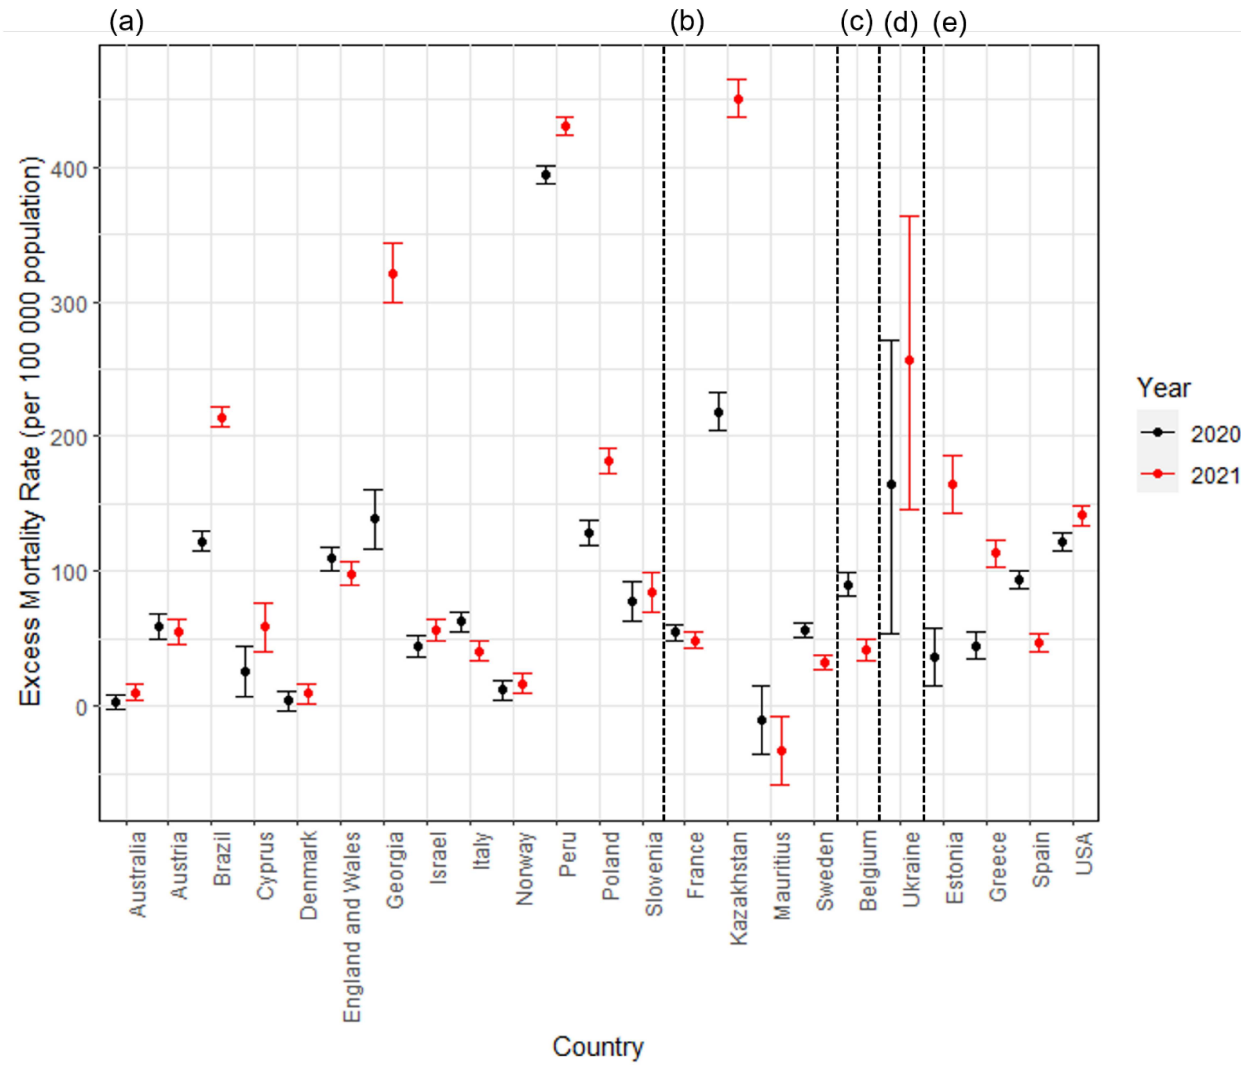

**Figure S4. Cumulative excess age-standardized mortality rate for males for 2020 and 2021.** Plot letters correspond to the age groups in which countries have provided data and therefore the age groups used for age standardization: (a) age groups <15, 15-44, 45-64, 65+; (b) age groups <20, 20-49, 50-69, 70+; (c) age groups <45, 45-64, 65+; (d) age groups <20, 20-69, 70+; (e) age groups <15, 15-64, 65+. The plot was produced using R.

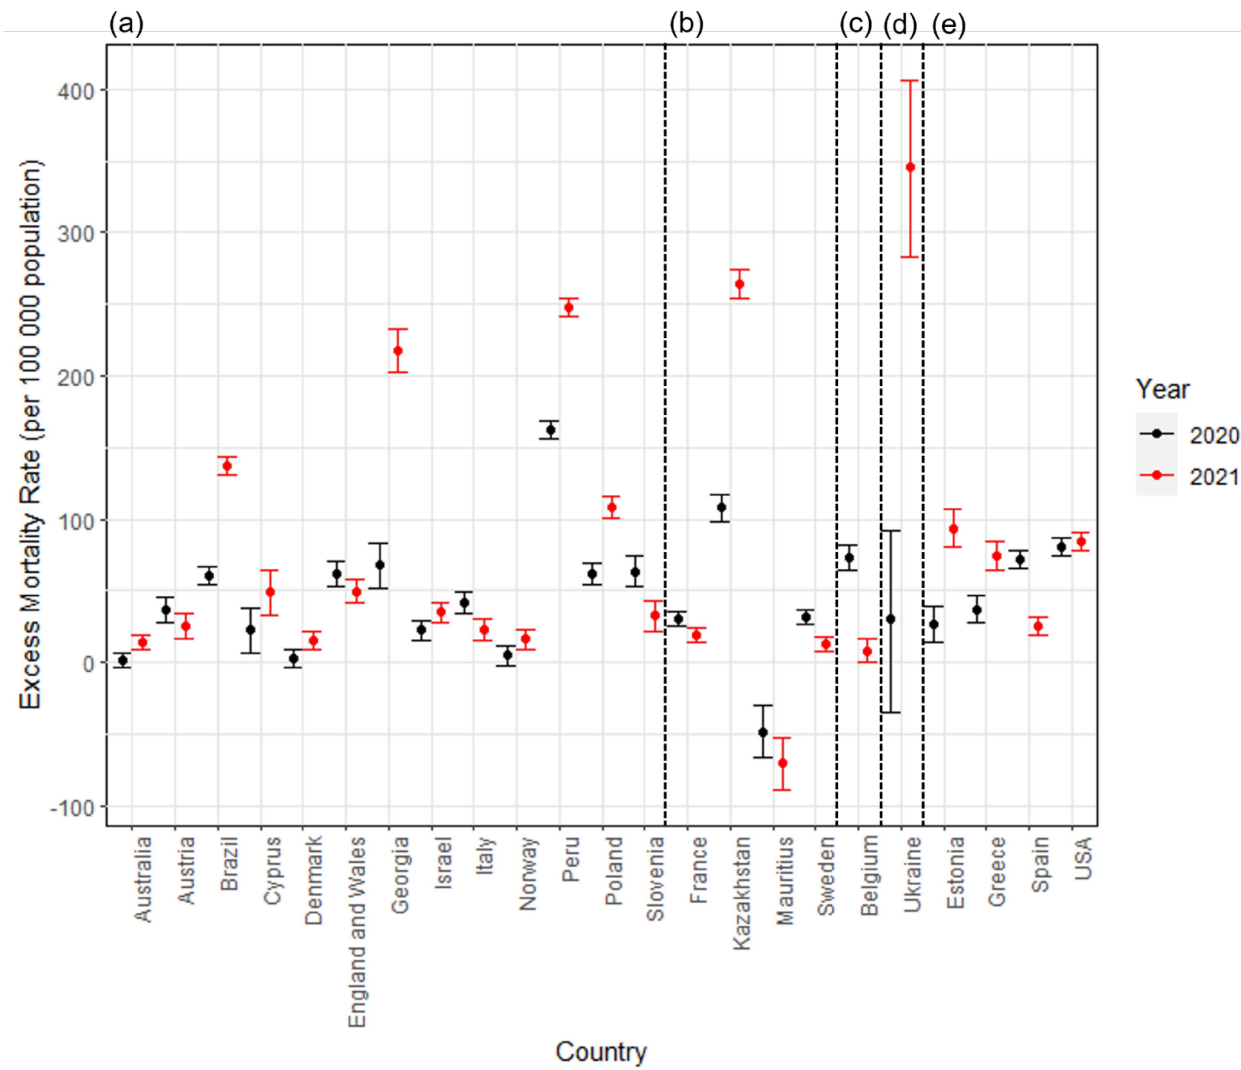

**Figure S5. Cumulative excess age-standardized mortality rate for females for 2020 and 2021.** Plot letters correspond to the age groups in which countries have provided data and therefore the age groups used for age standardization: (a) age groups <15, 15-44, 45-64, 65+; (b) age groups <20, 20-49, 50-69, 70+; (c) age groups <45, 45-64, 65+; (d) age groups <20, 20-69, 70+; (e) age groups <15, 15-64, 65+. The plot was produced using R.

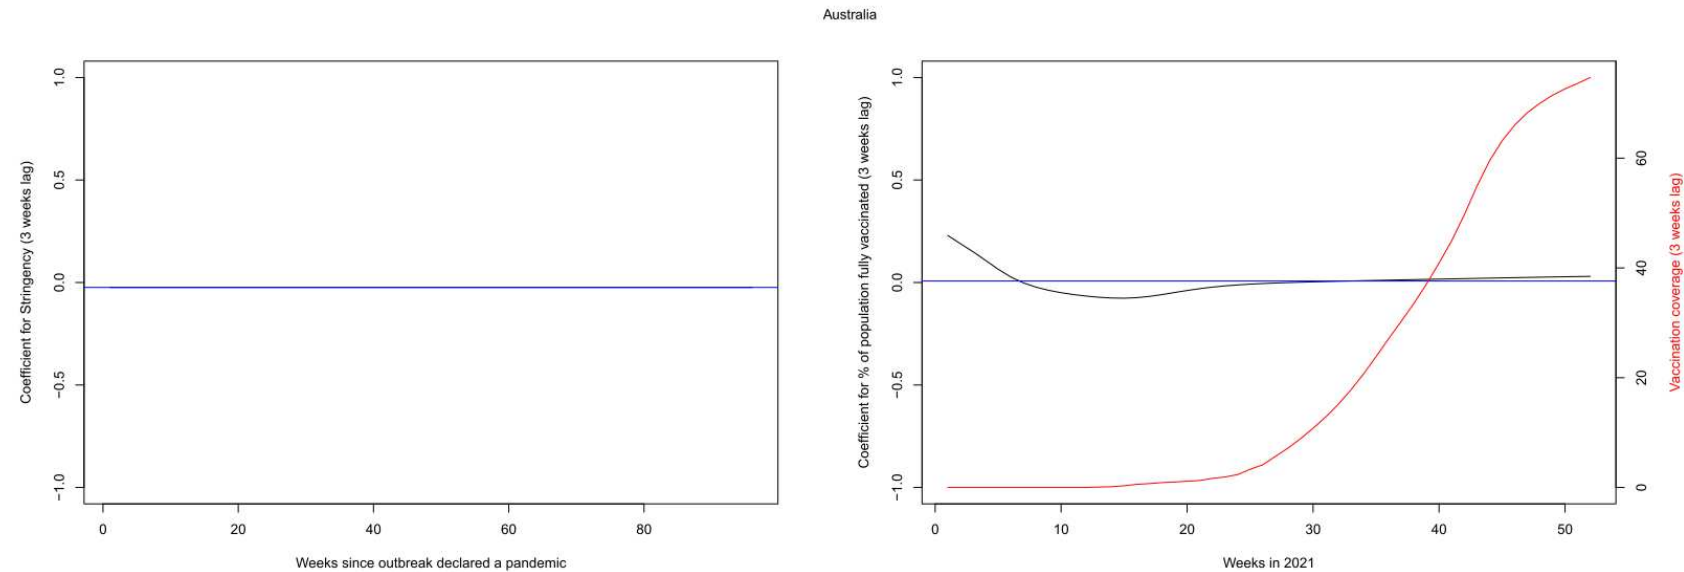

**Figure S6 – Time varying coefficients for A) stringency index (3-week lag) and B) % population fully vaccinated (3-week lag) for Australia.**

Black line marks coefficients obtained from a regression model with time-varying exposure against excess mortality z-scores, adjusting for weekly COVID-19 incidence. The x-axis represents number of weeks, during 2020-2021 for A and during 2021 for B. Blue line represents the coefficient from the corresponding non-time-varying linear regression model. Red line marks vaccination coverage as % of population fully vaccinated in 2021.

**Stringency:** Negative coefficients throughout. NB: blue line is superimposed on the black line.

**Vaccination:** Coefficients drop to negative values shortly after vaccine introduction (week 15), but then increase again to reach a plateau that is positive at the end of 2021.

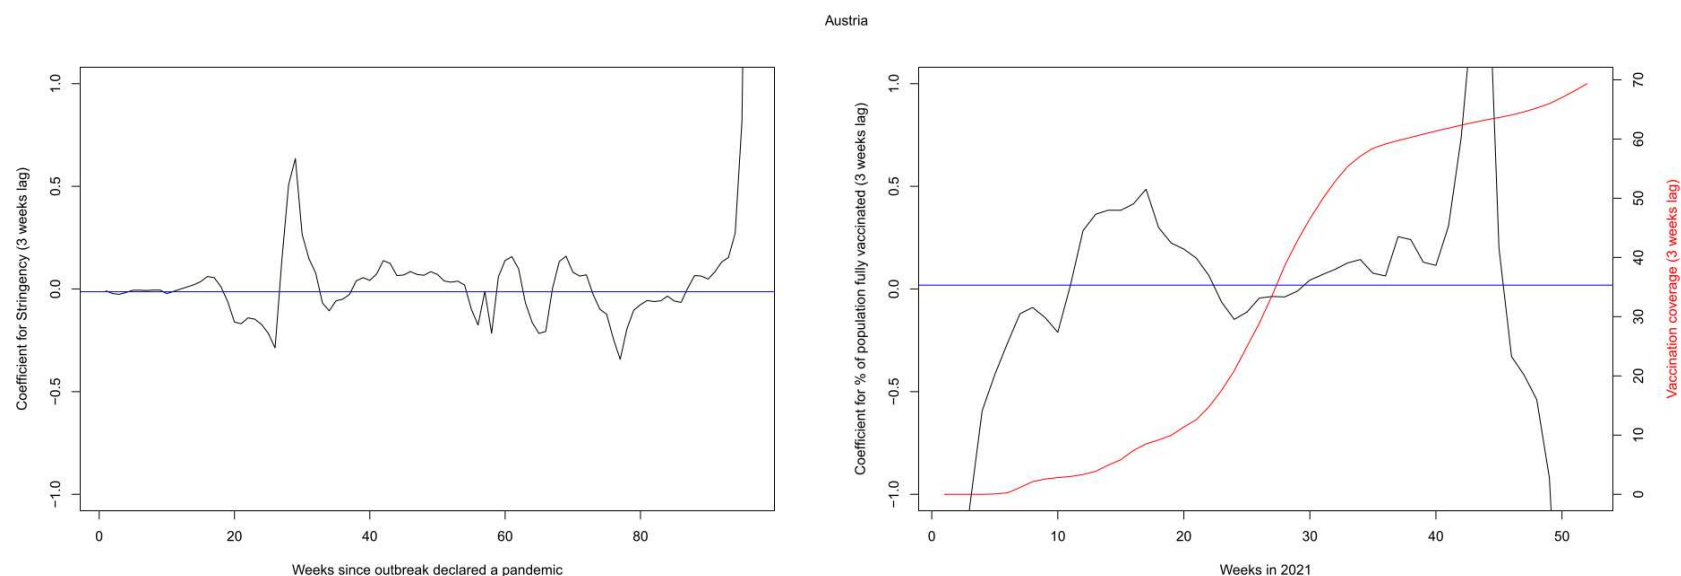

**Figure S7 – Time varying coefficients for A) stringency index (3-week lag) and B) % population fully vaccinated (3-week lag) for Austria.**

Black line marks coefficients obtained from a regression model with time-varying exposure against excess mortality z-scores, adjusting for weekly COVID-19 incidence. The x-axis represents number of weeks, during 2020-2021 for A and during 2021 for B. Blue line represents the coefficient from the corresponding non-time-varying linear regression model. Red line marks vaccination coverage as % of population fully vaccinated in 2021.

**Stringency:** Coefficients fluctuating between positive and negative values throughout 2020-2021

**Vaccination:** Coefficients start in the negative range. The coefficients then increase towards zero and weak positive values (weeks 15-35), but sharply increase between weeks 40-45, to drop to negative values again at the end of 2021.

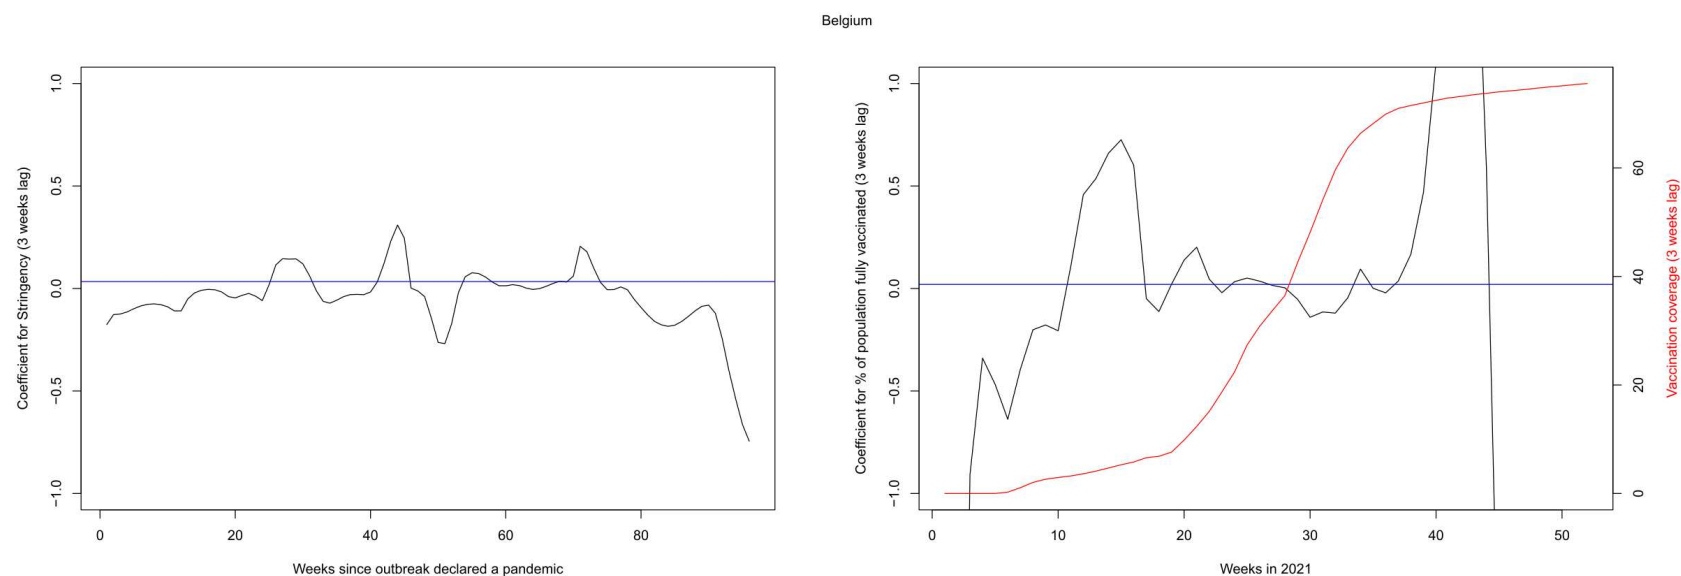

**Figure S8 – Time varying coefficients for A) stringency index (3-week lag) and B) % population fully vaccinated (3-week lag) for Belgium.**

Black line marks coefficients obtained from a regression model with time-varying exposure against excess mortality z-scores, adjusting for weekly COVID-19 incidence. The x-axis represents number of weeks, during 2020-2021 for A and during 2021 for B. Blue line represents the coefficient from the corresponding non-time-varying linear regression model. Red line marks vaccination coverage as % of population fully vaccinated in 2021.

**Stringency:** Coefficients fluctuating between positive and negative values throughout 2020-2021, but were in the negative range for most of the years.

**Vaccination:** Coefficients start in the negative range. The coefficients then increase towards zero and weak positive values in weeks 12-35. They then sharply increase until week 42, to drop to negative values again at the end of 2021.



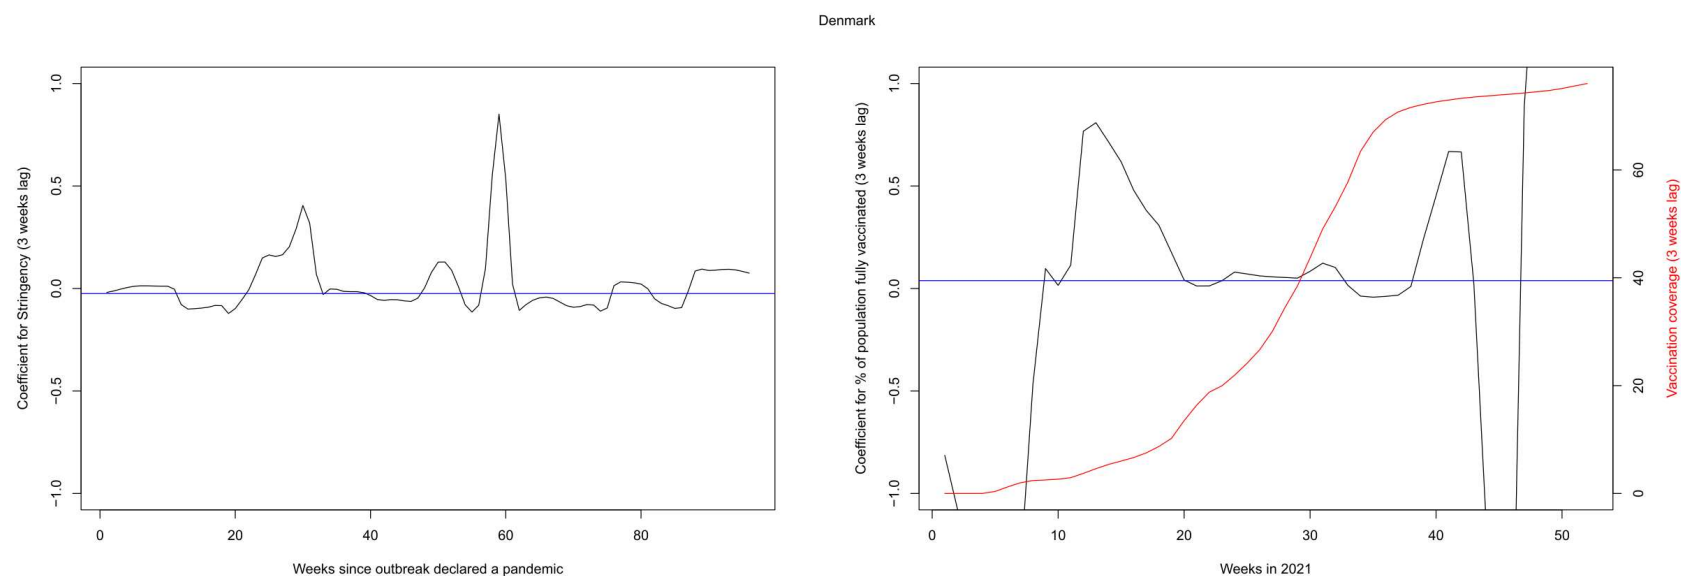

**Figure S9 – Time varying coefficients for A) stringency index (3-week lag) and B) % population fully vaccinated (3-week lag) for Denmark.**

Black line marks coefficients obtained from a regression model with time-varying exposure against excess mortality z-scores, adjusting for weekly COVID-19 incidence. The x-axis represents number of weeks, during 2020-2021 for A and during 2021 for B. Blue line represents the coefficient from the corresponding non-time-varying linear regression model. Red line marks vaccination coverage as % of population fully vaccinated in 2021.

**Stringency:** Coefficients fluctuating between positive and negative values throughout 2020-2021.

**Vaccination:** Coefficients start in the negative range. Then, coefficients increase towards zero (week 15). There are two sharp peaks between weeks 10-20 and weeks 38-42. The coefficients drop sharply to negative values between 42-48 weeks to increase sharply again at the end of 2021.

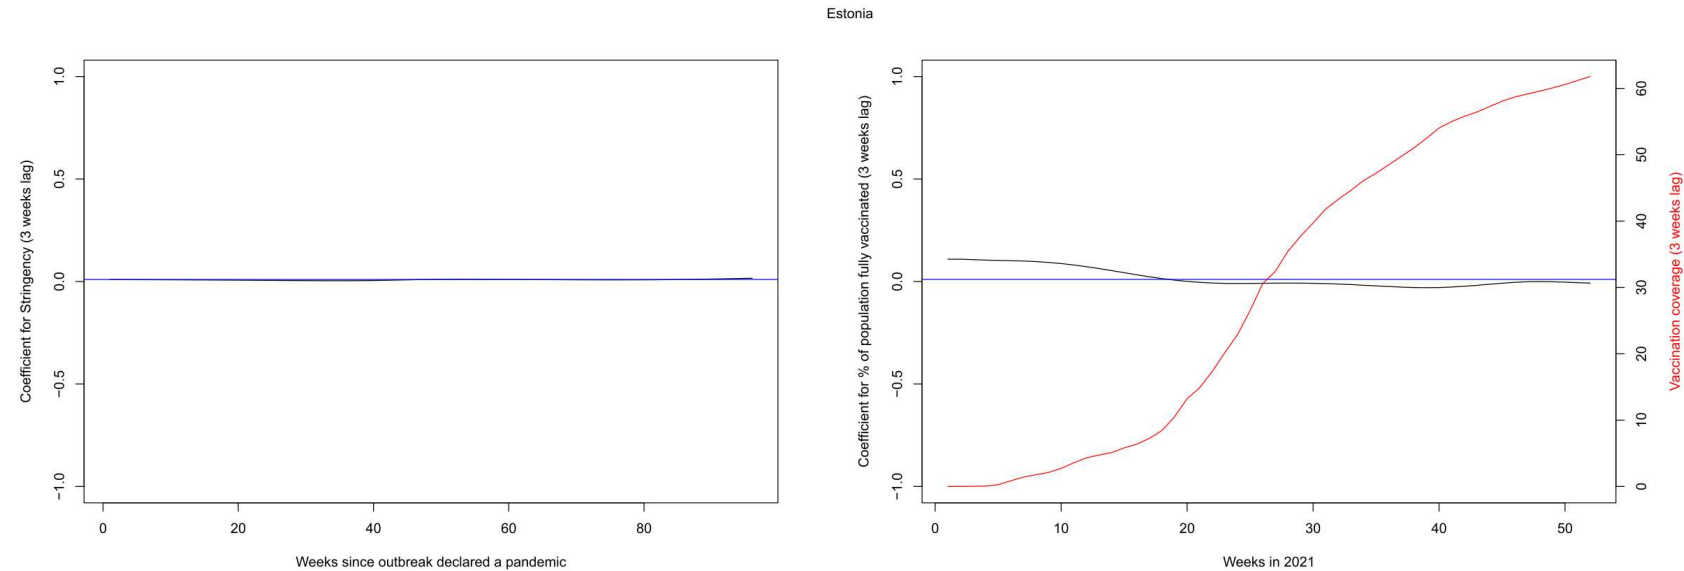

**Figure S10 – Time varying coefficients for A) stringency index (3-week lag) and B) % population fully vaccinated (3-week lag) for Estonia.**

Black line marks coefficients obtained from a regression model with time-varying exposure against excess mortality z-scores, adjusting for weekly COVID-19 incidence. The x-axis represents number of weeks, during 2020-2021 for A and during 2021 for B. Blue line represents the coefficient from the corresponding non-time-varying linear regression model. Red line marks vaccination coverage as % of population fully vaccinated in 2021.

**Stringency:** Positive coefficient throughout,. NB: black line is superimposed by the blue line.

**Vaccination:** Coefficients start positive and then drop to negative values around week 20, and remain in the negative range throughout the rest of the year. Despite still negative, the coefficients are slightly attenuated between weeks 40-50.

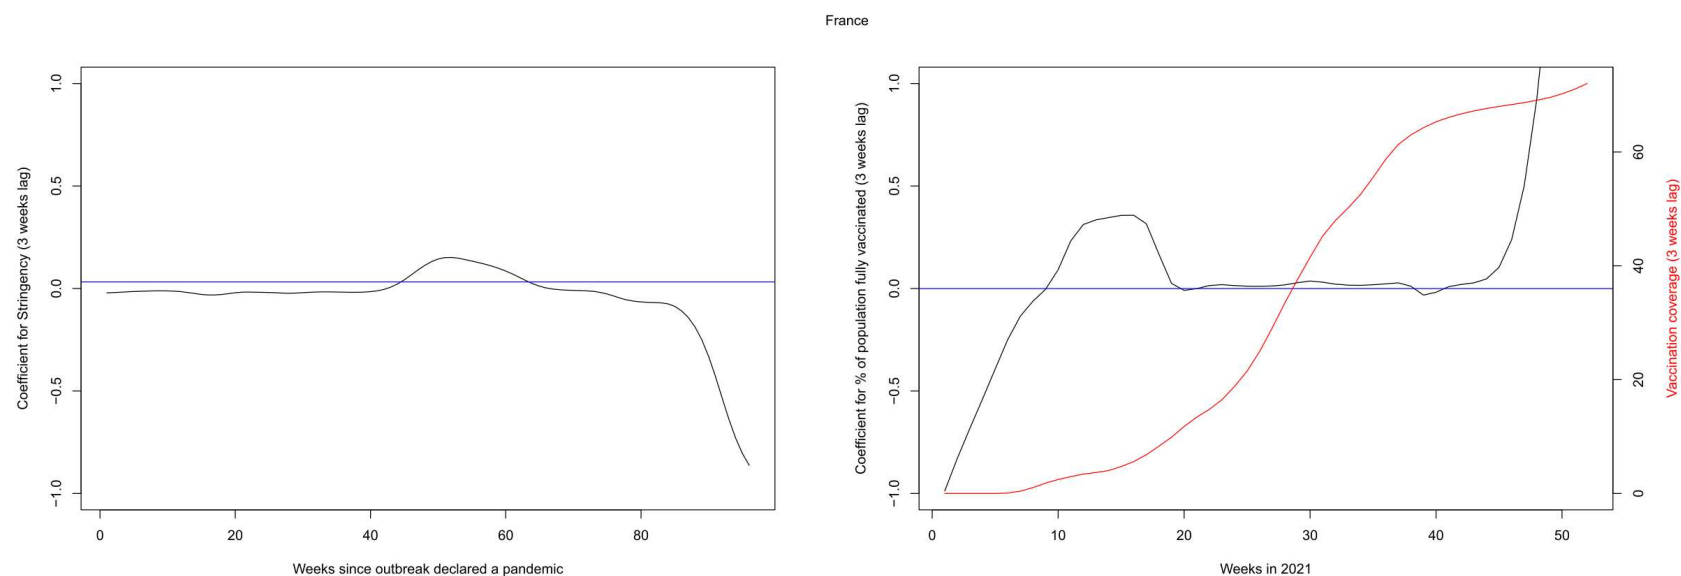

**Figure S11 – Time varying coefficients for A) stringency index (3-week lag) and B) % population fully vaccinated (3-week lag) for France.**

Black line marks coefficients obtained from a regression model with time-varying exposure against excess mortality z-scores, adjusting for weekly COVID-19 incidence. The x-axis represents number of weeks, during 2020-2021 for A and during 2021 for B. Blue line represents the coefficient from the corresponding non-time-varying linear regression model. Red line marks vaccination coverage as % of population fully vaccinated in 2021.

**Stringency:** Coefficients were negative for most of 2020-2021, with a brief increase to positive values in the first weeks of 2021.

**Vaccination:** Coefficients start in the negative range. Coefficients then increase towards zero and positive values (weeks 10-30). They then remain stable around zero until week 42 when they sharply increase and remain high until the end of 2021.

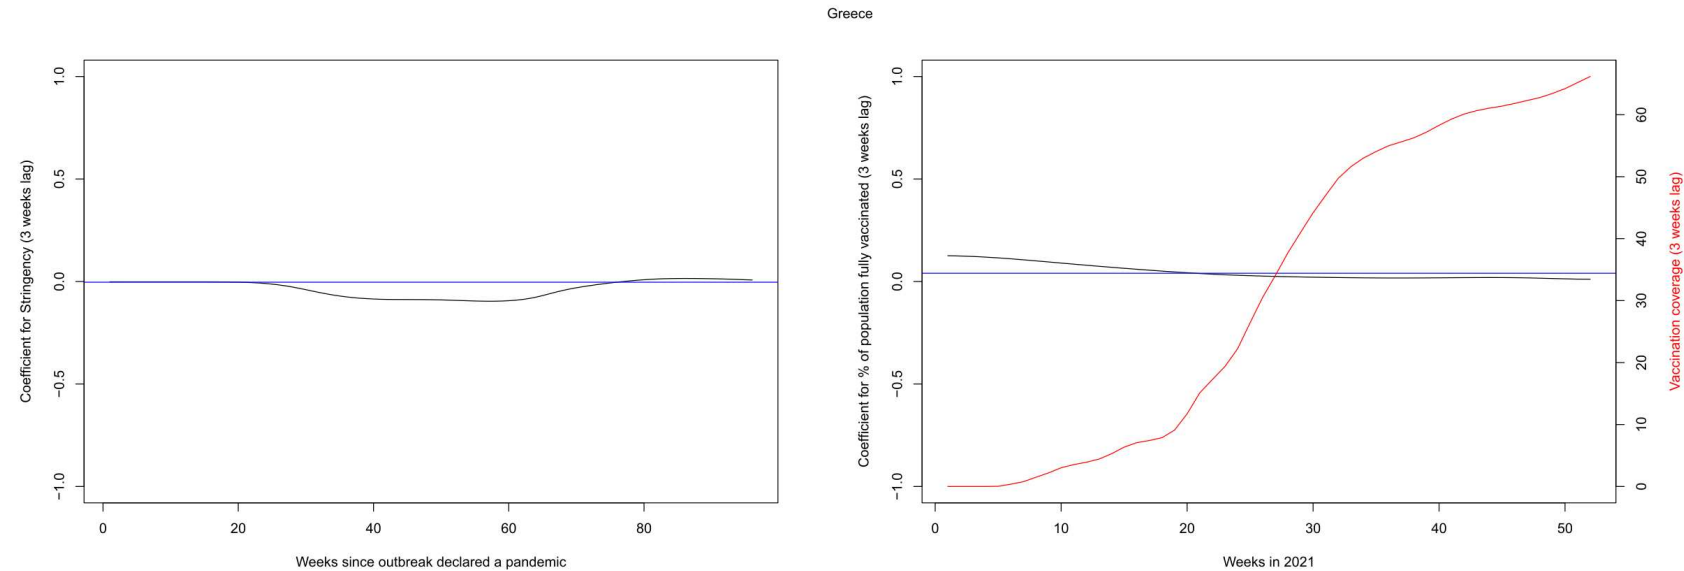

**Figure S12 – Time varying coefficients for A) stringency index (3-week lag) and B) % population fully vaccinated (3-week lag) for Greece.**

Black line marks coefficients obtained from a regression model with time-varying exposure against excess mortality z-scores, adjusting for weekly COVID-19 incidence. The x-axis represents number of weeks, during 2020-2021 for A and during 2021 for B. Blue line represents the coefficient from the corresponding non-time-varying linear regression model. Red line marks vaccination coverage as % of population fully vaccinated in 2021.

**Stringency:** Coefficients were negative for most of 2020-2021, with a brief increase to positive values during the last weeks of 2021.

**Vaccination:** Coefficients were positive and dropped to zero and negative values after week 20 and remained negative until the end of the year.

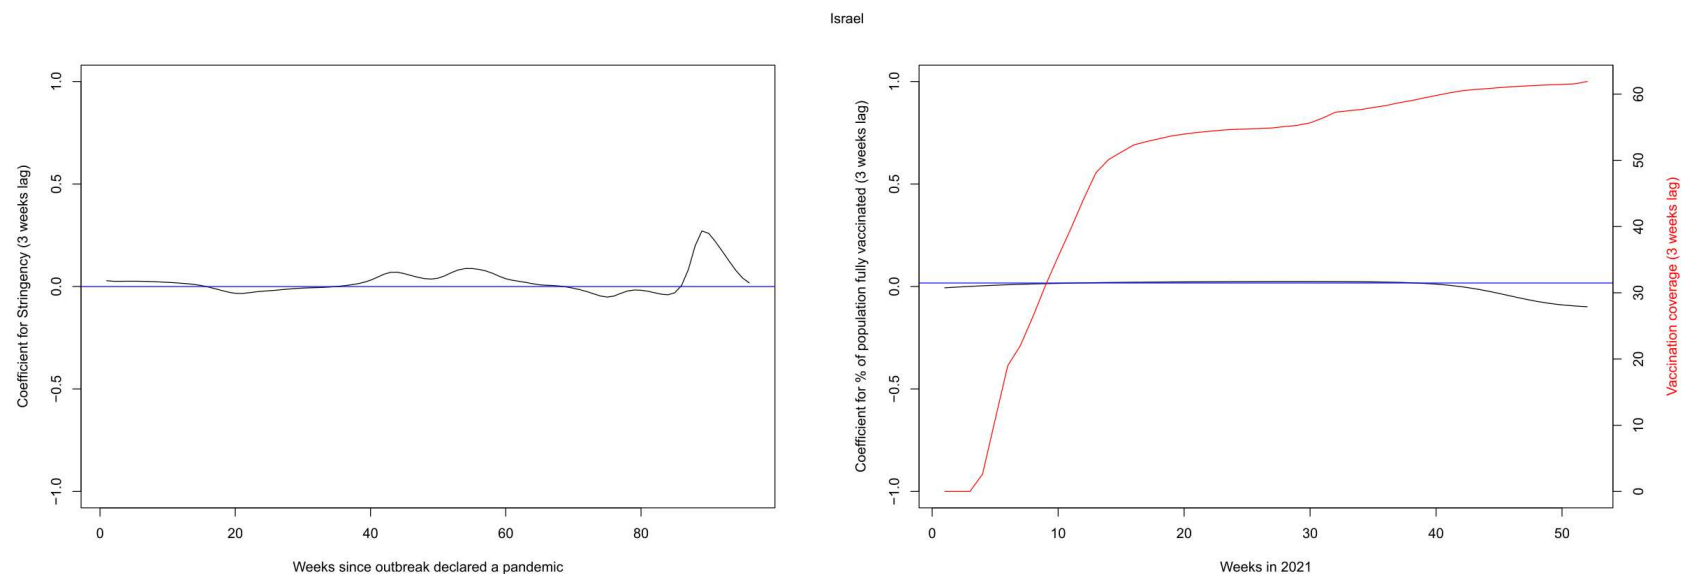

**Figure S13 – Time varying coefficients for A) stringency index (3-week lag) and B) % population fully vaccinated (3-week lag) for Israel.**

Black line marks coefficients obtained from a regression model with time-varying exposure against excess mortality z-scores, adjusting for weekly COVID-19 incidence. The x-axis represents number of weeks, during 2020-2021 for A and during 2021 for B. Blue line represents the coefficient from the corresponding non-time-varying linear regression model. Red line marks vaccination coverage as % of population fully vaccinated in 2021.

**Stringency:** Coefficients fluctuating between positive and negative values throughout 2020-2021.

**Vaccination:** Coefficients start in the negative range. The coefficients then increase slightly towards zero (weeks 10-35), and then drop to negative values again at the end of 2021.

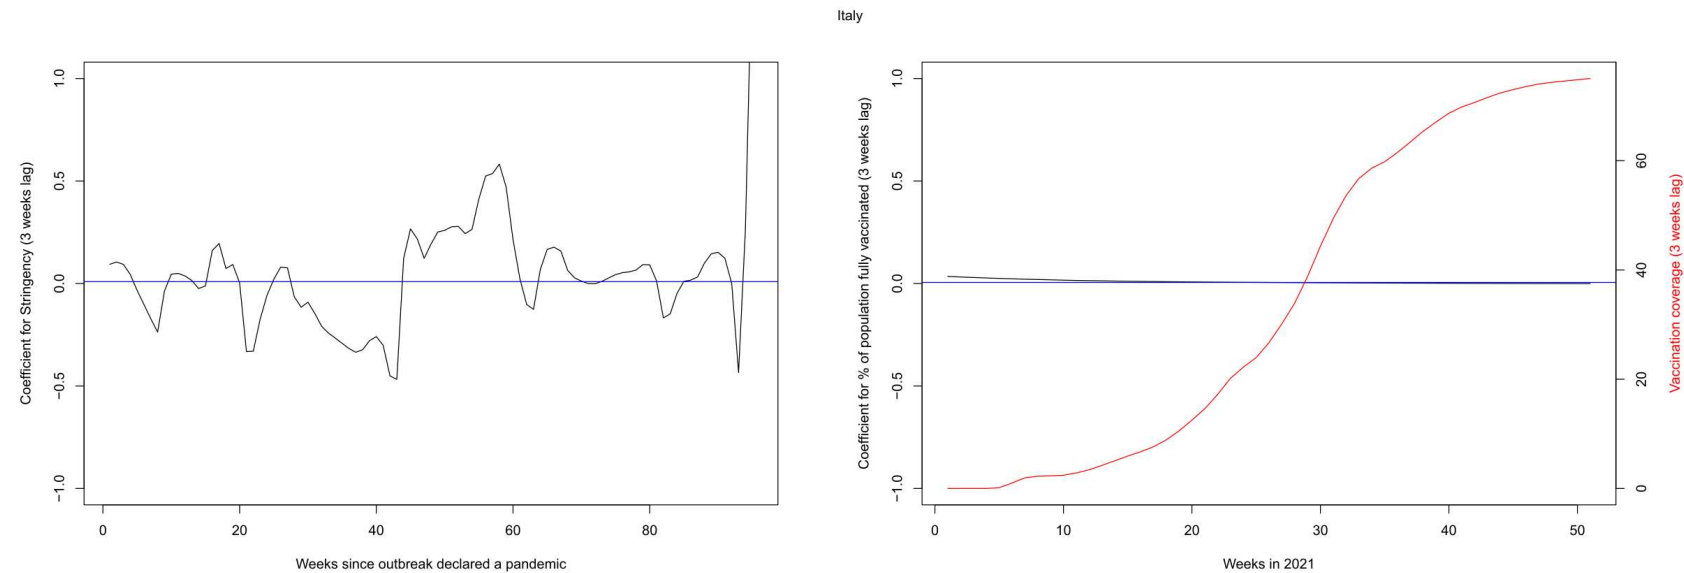

**Figure S14 – Time varying coefficients for A) stringency index (3-week lag) and B) % population fully vaccinated (3-week lag) for Italy.**

Black line marks coefficients obtained from a regression model with time-varying exposure against excess mortality z-scores, adjusting for weekly COVID-19 incidence. The x-axis represents number of weeks, during 2020-2021 for A and during 2021 for B. Blue line represents the coefficient from the corresponding non-time-varying linear regression model. Red line marks vaccination coverage as % of population fully vaccinated in 2021.

**Stringency:** Coefficients fluctuating between positive and negative values throughout 2020-2021.

**Vaccination:** Coefficients were positive and dropped to zero and weak negative values after week 20 and remained negative until the end of the year.

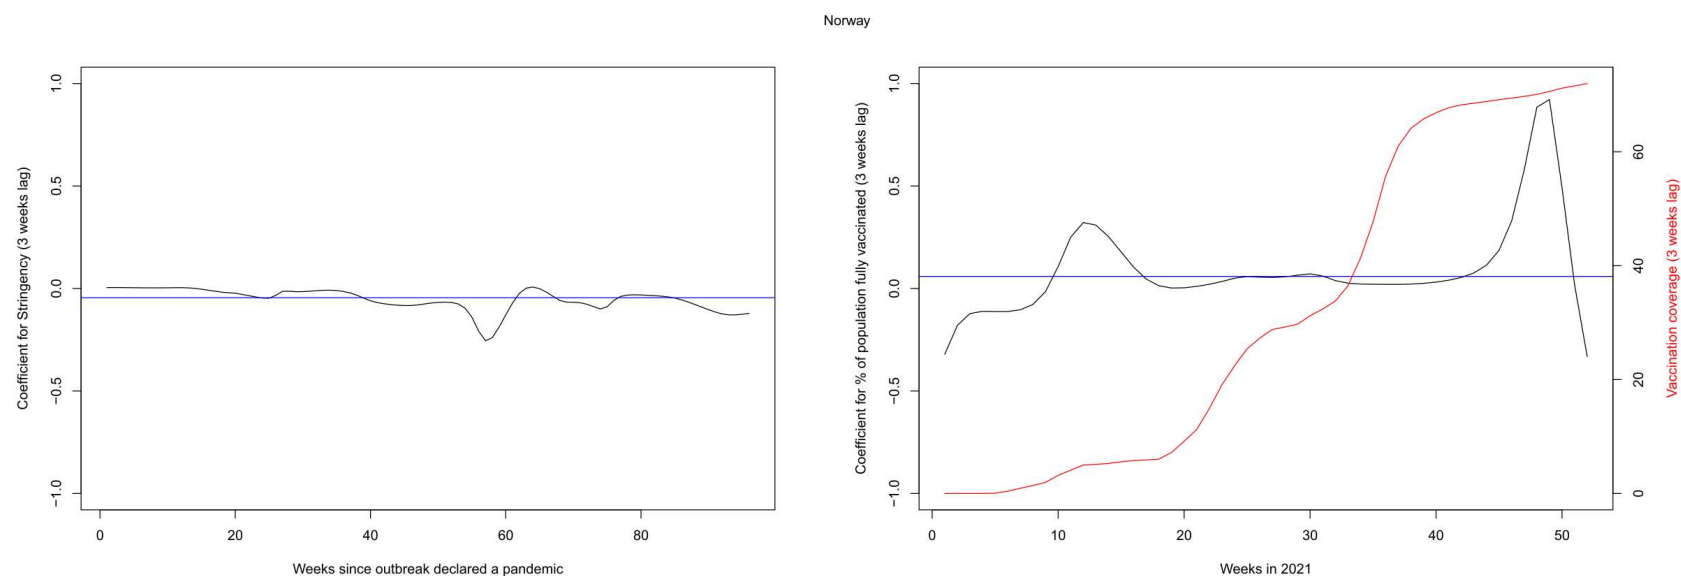

**Figure S15 – Time varying coefficients for A) stringency index (3-week lag) and B) % population fully vaccinated (3-week lag) for Norway.**

Black line marks coefficients obtained from a regression model with time-varying exposure against excess mortality z-scores, adjusting for weekly COVID-19 incidence. The x-axis represents number of weeks, during 2020-2021 for A and during 2021 for B. Blue line represents the coefficient from the corresponding non-time-varying linear regression model. Red line marks vaccination coverage as % of population fully vaccinated in 2021.

**Stringency:** Coefficients fluctuating but were negative values throughout 2020-2021

**Vaccination:** Coefficients start in the negative range. Then, coefficients increase towards zero (week 10), where they largely remain with the exception of two sharp peaks between weeks 10-20 and weeks 40-50.

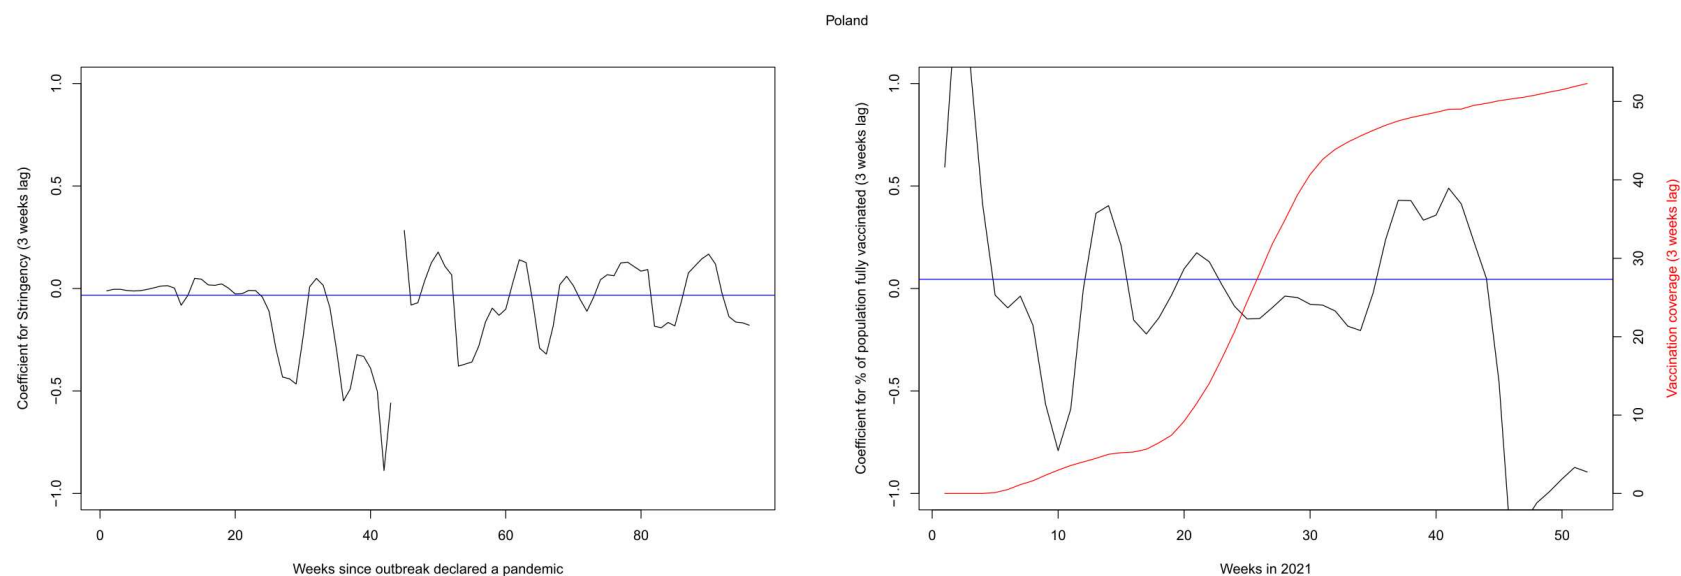

**Figure S16 – Time varying coefficients for A) stringency index (3-week lag) and B) % population fully vaccinated (3-week lag) for Poland.**

Black line marks coefficients obtained from a regression model with time-varying exposure against excess mortality z-scores, adjusting for weekly COVID-19 incidence. The x-axis represents number of weeks, during 2020-2021 for A and during 2021 for B. Blue line represents the coefficient from the corresponding non-time-varying linear regression model. Red line marks vaccination coverage as % of population fully vaccinated in 2021.

**Stringency:** Coefficients fluctuating between positive and negative values throughout 2020-2021, but were in the negative range for most of the years.

**Vaccinations:** Coefficients start in the positive range and from week 5 onwards fluctuate between positive and negative values. There is a brief sustained increase in the coefficients between weeks 35-45, but the coefficients then drop back to negative values.



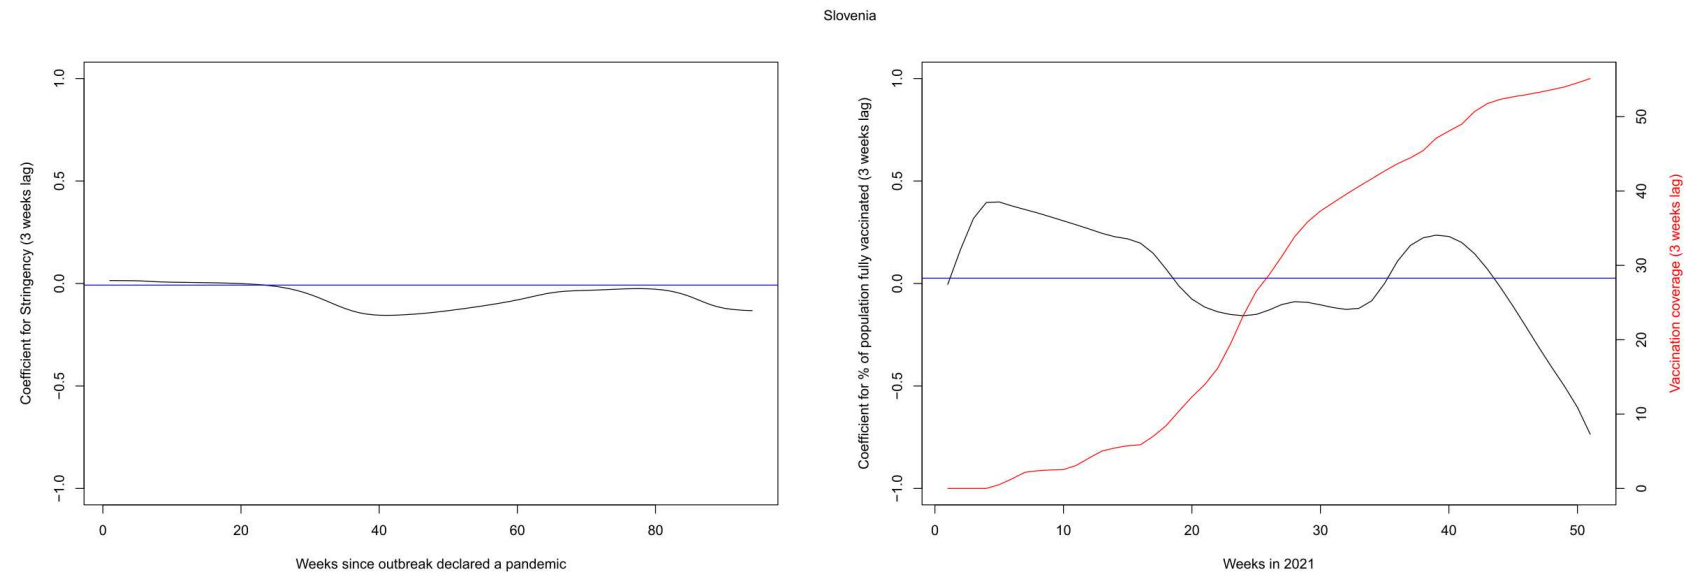

**Figure S17 – Time varying coefficients for A) stringency index (3-week lag) and B) % population fully vaccinated (3-week lag) for Slovenia.**

Black line marks coefficients obtained from a regression model with time-varying exposure against excess mortality z-scores, adjusting for weekly COVID-19 incidence. The x-axis represents number of weeks, during 2020-2021 for A and during 2021 for B. Blue line represents the coefficient from the corresponding non-time-varying linear regression model. Red line marks vaccination coverage as % of population fully vaccinated in 2021.

**Stringency:** Coefficients fluctuating throughout 2020-2021, but were in the negative range for most of the years.

**Vaccinations:** Coefficients start in the positive range but drop to negative values between weeks 20-35. There is a brief sustained increase in the coefficients between weeks 35-45, but the coefficients then drop back to negative values.

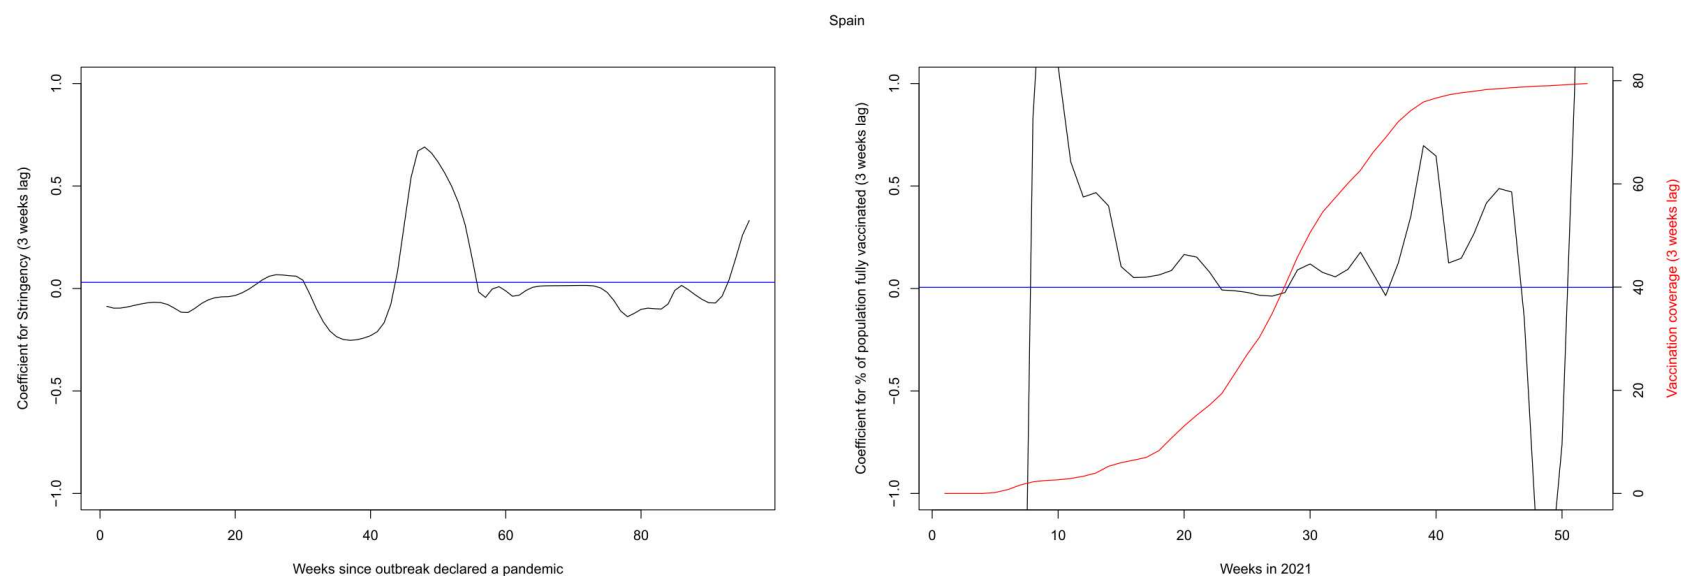

**Figure S18 – Time varying coefficients for A) stringency index (3-week lag) and B) % population fully vaccinated (3-week lag) for Spain.**

Black line marks coefficients obtained from a regression model with time-varying exposure against excess mortality z-scores, adjusting for weekly COVID-19 incidence. The x-axis represents number of weeks, during 2020-2021 for A and during 2021 for B. Blue line represents the coefficient from the corresponding non-time-varying linear regression model. Red line marks vaccination coverage as % of population fully vaccinated in 2021.

**Stringency:** Coefficients fluctuating throughout 2020-2021, but were in the negative range for most of the years.

**Vaccination:** Coefficients increase towards zero and positive values (weeks 10-35), but then decrease and sharply increase to positive values again at the end of 2021.

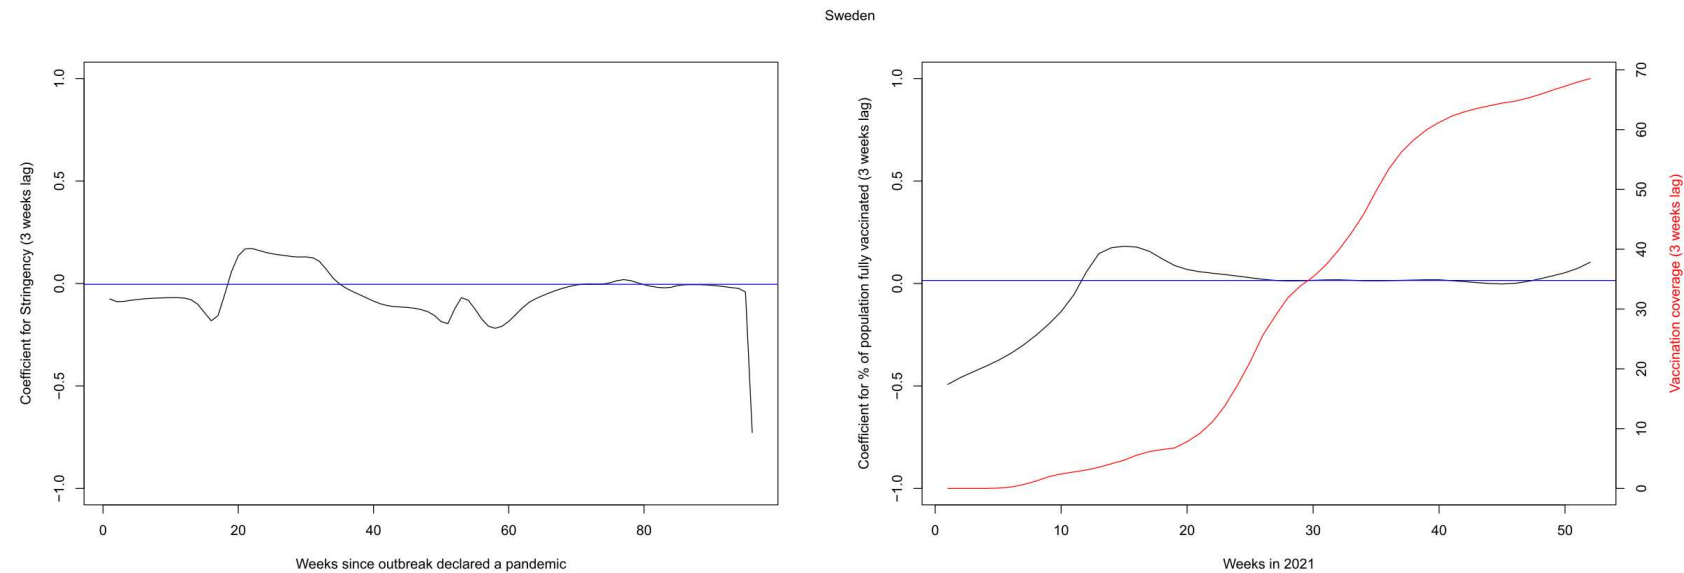

**Figure S19 – Time varying coefficients for A) stringency index (3-week lag) and B) % population fully vaccinated (3-week lag) for Sweden.**

Black line marks coefficients obtained from a regression model with time-varying exposure against excess mortality z-scores, adjusting for weekly COVID-19 incidence. The x-axis represents number of weeks, during 2020-2021 for A and during 2021 for B. Blue line represents the coefficient from the corresponding non-time-varying linear regression model. Red line marks vaccination coverage as % of population fully vaccinated in 2021.

**Stringency:** Coefficients fluctuating throughout 2020-2021, but were in the negative range for most of the years.

**Vaccination:** Coefficients start in the negative range indicating that the first vaccinations, that prioritised older and vulnerable portions of the population, managed to mitigate excess mortality. Then, coefficients increase towards zero and weak positive values (week 15), where they remain for the rest of the year.

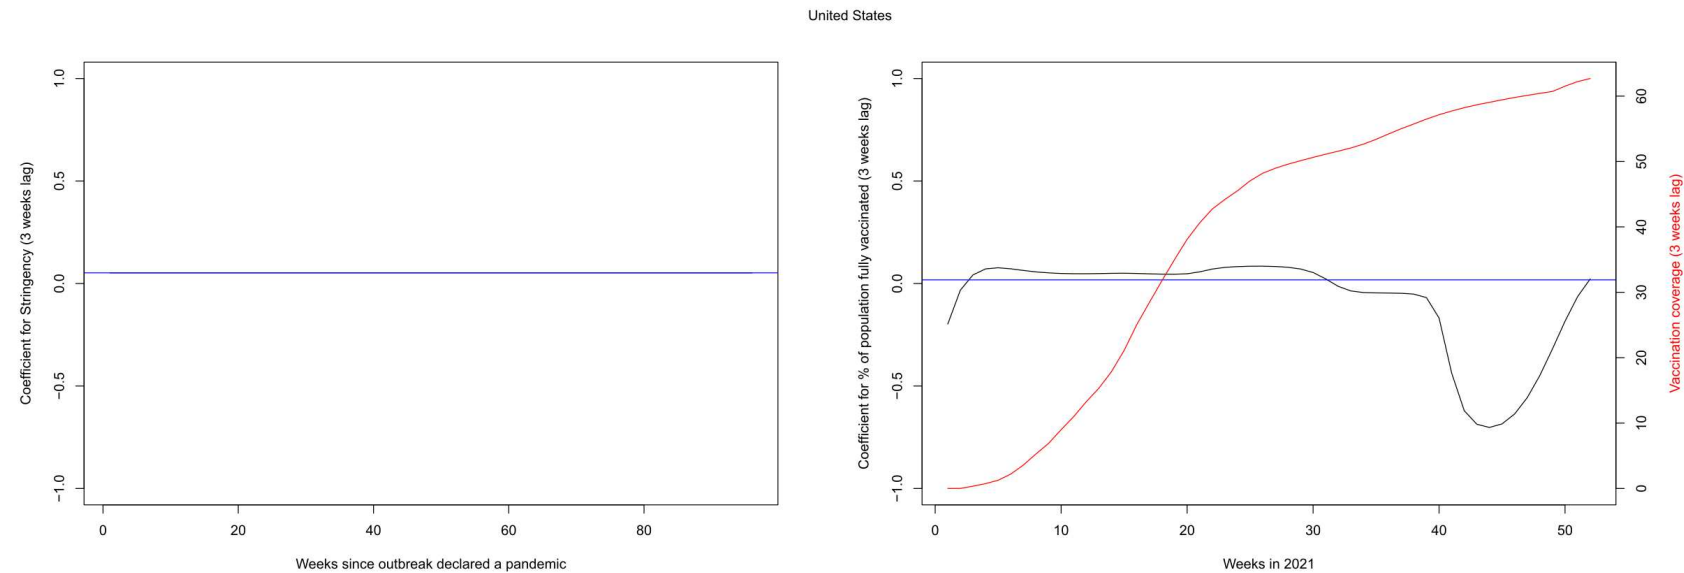

**Figure S20 – Time varying coefficients for A) stringency index (3-week lag) and B) % population fully vaccinated (3-week lag) for Australia.**

Black line marks coefficients obtained from a regression model with time-varying exposure against excess mortality z-scores, adjusting for weekly COVID-19 incidence. The x-axis represents number of weeks, during 2020-2021 for A and during 2021 for B. Blue line represents the coefficient from the corresponding non-time-varying linear regression model. Red line marks vaccination coverage as % of population fully vaccinated in 2021.

**Stringency:** Positive coefficients throughout. NB: black line is superimposed by the blue line.

**Vaccination:** Coefficients start negative but increase to positive values between weeks 5-30. The coefficients then drop to negative values between weeks 30-50, and then increase again to zero at the end of 2021.

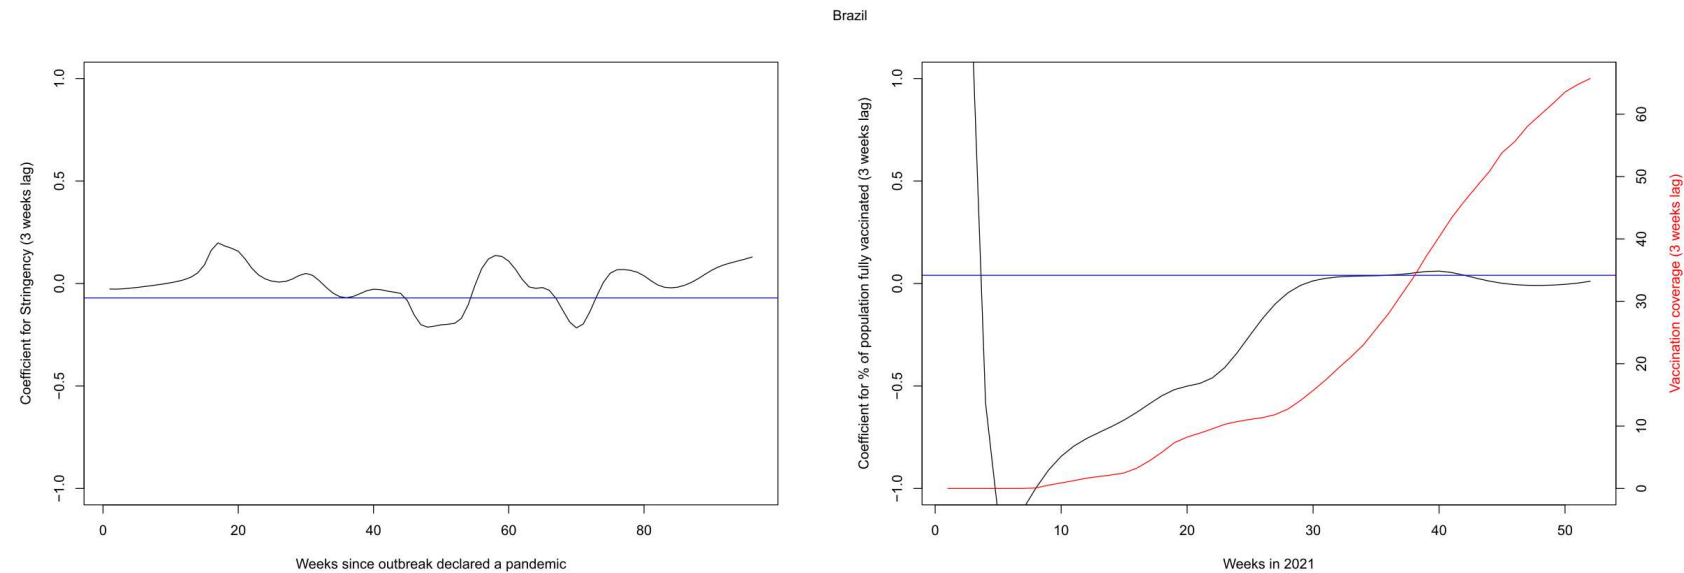

**Figure S21 – Time varying coefficients for A) stringency index (3-week lag) and B) % population fully vaccinated (3-week lag) for Brazil.**

Black line marks coefficients obtained from a regression model with time-varying exposure against excess mortality z-scores, adjusting for weekly COVID-19 incidence. The x-axis represents number of weeks, during 2020-2021 for A and during 2021 for B. Blue line represents the coefficient from the corresponding non-time-varying linear regression model. Red line marks vaccination coverage as % of population fully vaccinated in 2021.

**Stringency:** Coefficients fluctuating between positive and negative values throughout 2020-2021

**Vaccination:** Coefficients start positive and drop to negative values after vaccine introduction (weeks 5-30), but then increase again to reach a plateau around zero at the end of 2021.

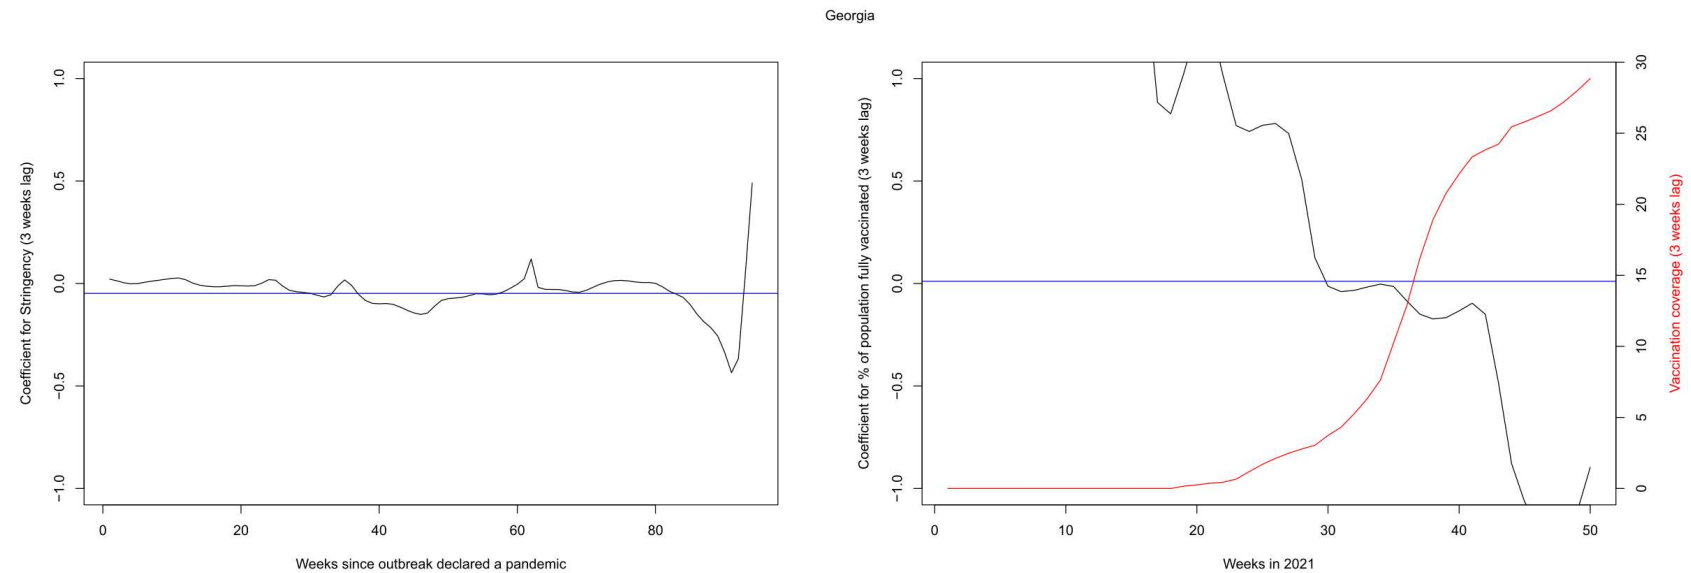

**Figure S22 – Time varying coefficients for A) stringency index (3-week lag) and B) % population fully vaccinated (3-week lag) for Georgia.**

Black line marks coefficients obtained from a regression model with time-varying exposure against excess mortality z-scores, adjusting for weekly COVID-19 incidence. The x-axis represents number of weeks, during 2020-2021 for A and during 2021 for B. Blue line represents the coefficient from the corresponding non-time-varying linear regression model. Red line marks vaccination coverage as % of population fully vaccinated in 2021.

**Stringency:** Coefficients fluctuating between positive and negative values, but were mostly negative in throughout 2020-2021

**Vaccination:** Coefficients start positive and then drop close to zero around week 30, and remain in the negative range throughout the rest of the year.

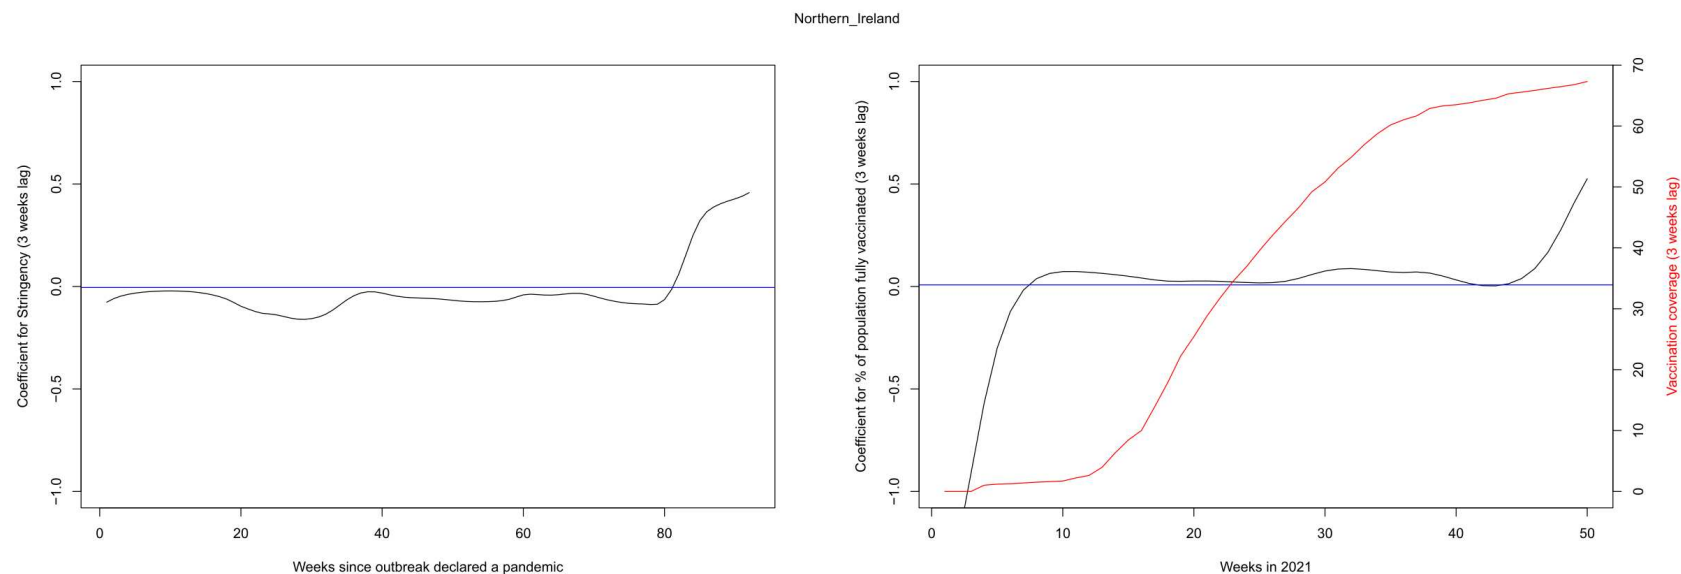

**Figure S23 – Time varying coefficients for A) stringency index (3-week lag) and B) % population fully vaccinated (3-week lag) for Northern Ireland.**

Black line marks coefficients obtained from a regression model with time-varying exposure against excess mortality z-scores, adjusting for weekly COVID-19 incidence. The x-axis represents number of weeks, during 2020-2021 for A and during 2021 for B. Blue line represents the coefficient from the corresponding non-time-varying linear regression model. Red line marks vaccination coverage as % of population fully vaccinated in 2021.

**Stringency:** Coefficients fluctuating throughout 2020-2021, but were in the negative range for most of the years.

**Vaccination:** Coefficients start in the negative range. Then, coefficients increase towards zero (week 7) where they remain until later in the year. There is one peak during the last 5 weeks of the year.

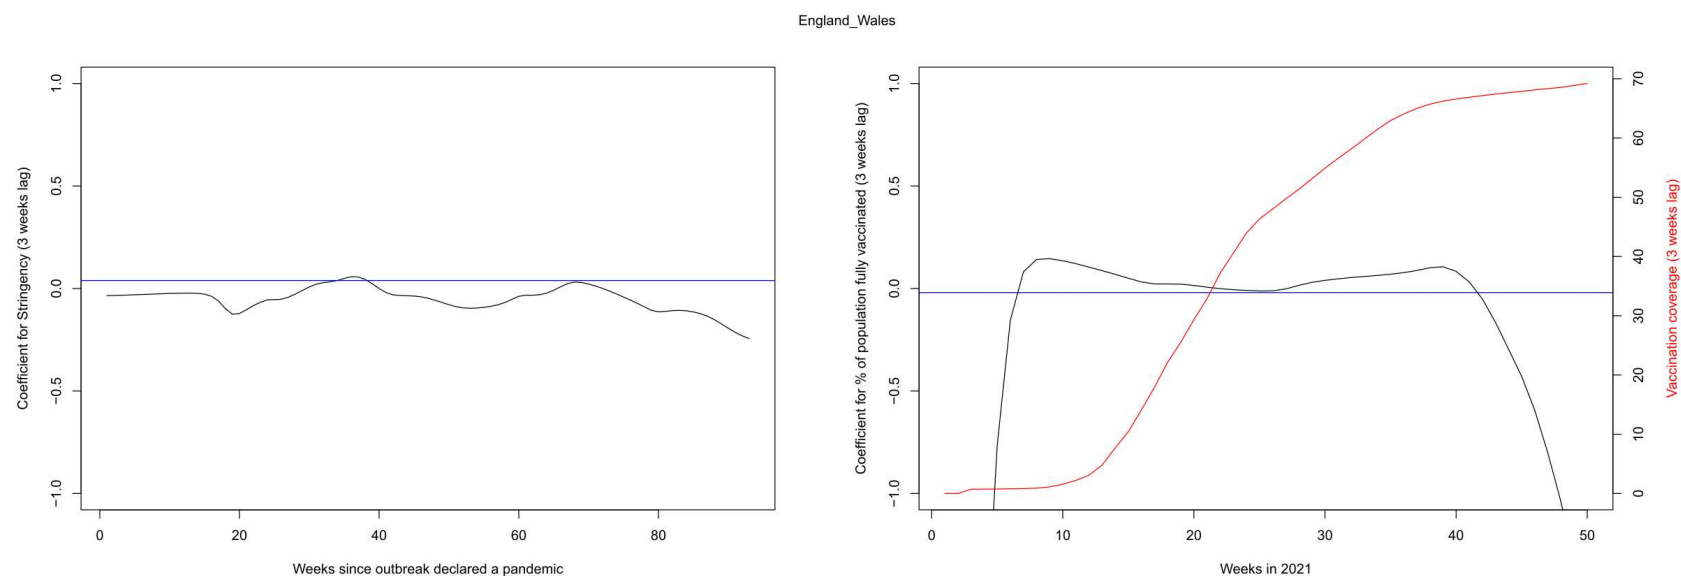

**Figure S24 – Time varying coefficients for A) stringency index (3-week lag) and B) % population fully vaccinated (3-week lag) for England and Wales.**

Black line marks coefficients obtained from a regression model with time-varying exposure against excess mortality z-scores, adjusting for weekly COVID-19 incidence. The x-axis represents number of weeks, during 2020-2021 for A and during 2021 for B. Blue line represents the coefficient from the corresponding non-time-varying linear regression model. Red line marks vaccination coverage as % of population fully vaccinated in 2021.

**Stringency:** Coefficients fluctuating throughout 2020-2021, but were in the negative range for most of the years.

**Vaccination:** Coefficients start in the negative range but quickly increase towards zero and weak positive values (week 8) where they remain until later in the year. There is a decrease in coefficients after week 40 of the year.



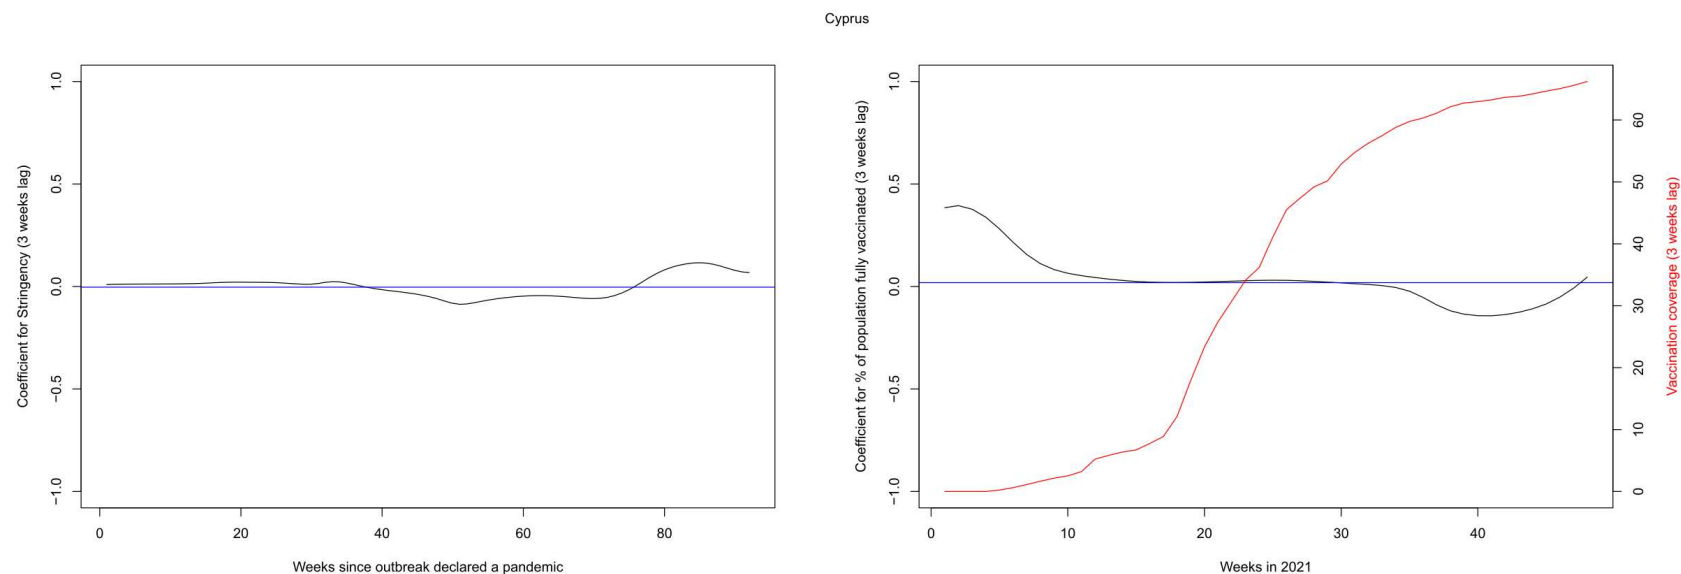

**Figure S25 – Time varying coefficients for A) stringency index (3-week lag) and B) % population fully vaccinated (3-week lag) for Cyprus.**

Black line marks coefficients obtained from a regression model with time-varying exposure against excess mortality z-scores, adjusting for weekly COVID-19 incidence. The x-axis represents number of weeks, during 2020-2021 for A and during 2021 for B. Blue line represents the coefficient from the corresponding non-time-varying linear regression model. Red line marks vaccination coverage as % of population fully vaccinated in 2021.

**Stringency:** Coefficients fluctuating between positive and negative values throughout 2020-2021

**Vaccination:** Coefficients start positive and then drop close to zero around week 15-30. They then remain in the negative range until the last few weeks of the year when they increase again to values close to zero.

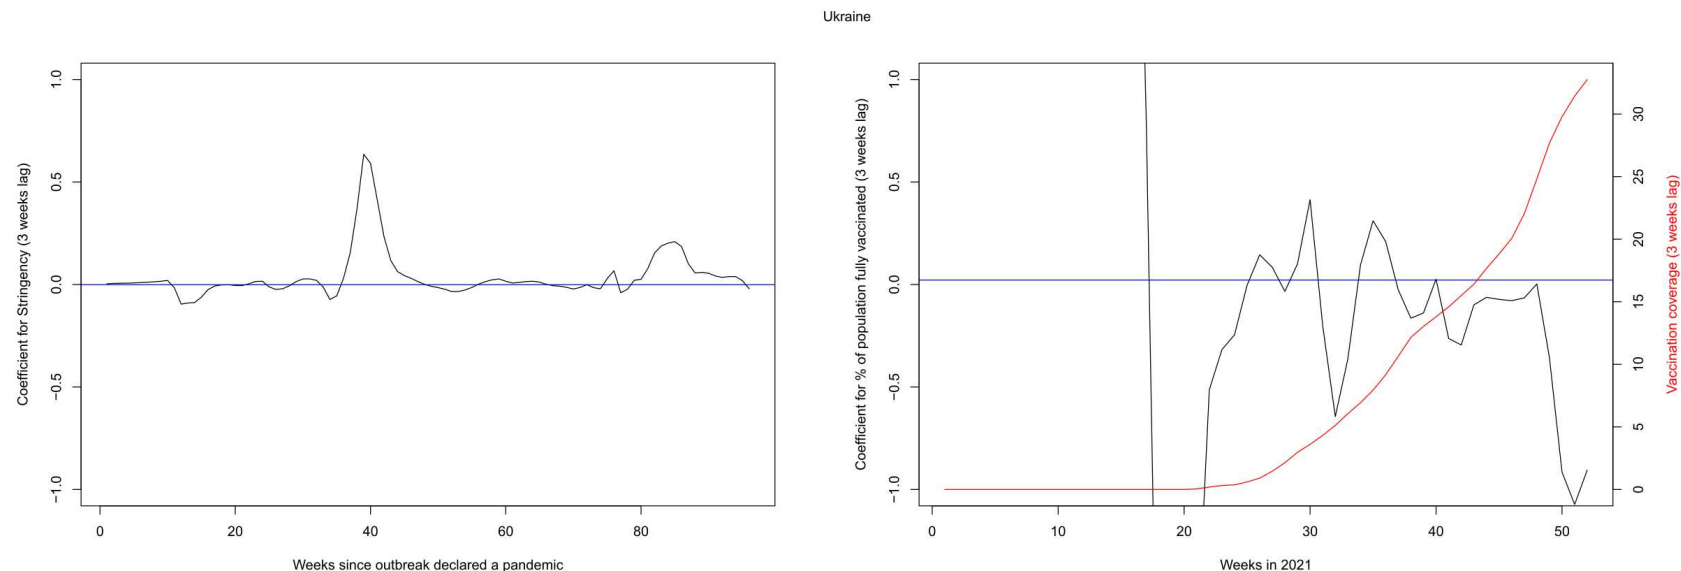

**Figure S26 – Time varying coefficients for A) stringency index (3-week lag) and B) % population fully vaccinated (3-week lag) for Ukraine.**

Black line marks coefficients obtained from a regression model with time-varying exposure against excess mortality z-scores, adjusting for weekly COVID-19 incidence. The x-axis represents number of weeks, during 2020-2021 for A and during 2021 for B. Blue line represents the coefficient from the corresponding non-time-varying linear regression model. Red line marks vaccination coverage as % of population fully vaccinated in 2021.

**Stringency:** Coefficients fluctuating between positive and negative values throughout 2020-2021

**Vaccination:** Coefficients were in the negative range, but increase towards zero around week 25. The coefficients then fluctuate close to zero until the last 5 weeks of the year when they drop to negative values again.

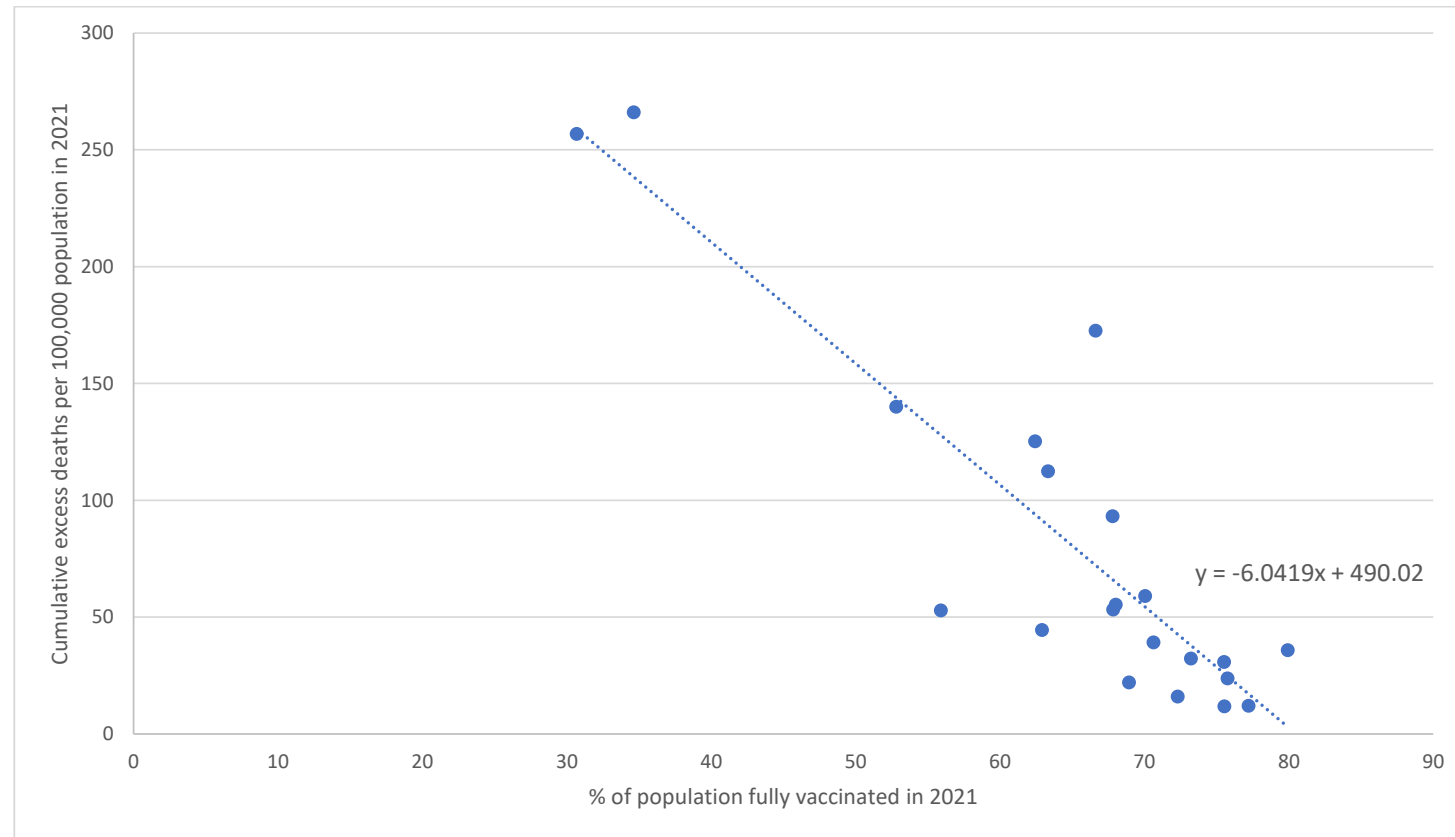

**Figure S27. Scatterplot of cumulative excess deaths per 100,000 population and % of population fully vaccinated, across countries, in 2021. Kazakhstan and Peru are excluded due to a completeness of vital registration systems of <90%.**
